# Supplementary material for: Activation of an endogenous retrovirus-associated long non-coding RNA in human adenocarcinoma
Source: PubMed Central journal article supplement (PMC4375928; doi:10.1186/s13073-015-0142-6), 2015-03-05
Supplement: 13073_2015_142_MOESM2_ESM.pdf [file 13073_2015_142_MOESM2_ESM.pdf]

Table S1: EVADR expression and PCR validation in the colorectal cancer dataset (SRP010181).

| Patient | Normal FPKM | Normal PCR | EVADR FPKM | EVADR PCR     |
|---------|-------------|------------|------------|---------------|
| 1       | 0           | negative   | 0          | negative      |
| 2       | 0           | negative   | 0          | negative      |
| 3       | 0           | negative   | 19.8408    | positive      |
| 4       | 0           | negative   | 3.2411     | positive      |
| 5       | 0           | negative   | 0          | negative      |
| 6       | 0           | negative   | 0          | negative      |
| 7       | 0           | negative   | 0          | negative      |
| 8       | 4.0475      | positive   | 0          | negative      |
| 9       | 0           | negative   | 0          | negative      |
| 10      | 0           | negative   | 0          | negative      |
| 11      | 0           | negative   | 0          | negative      |
| 12      | 0           | negative   | 10.6298    | positive      |
| 13      | 0           | negative   | 0          | negative      |
| 14      | 1.2541      | negative   | 7.0695     | positive      |
| 15      | 0           | negative   | 0          | negative      |
| 16      | 0           | negative   | 0          | negative      |
| 17      | 0           | negative   | 0          | negative      |
| 18      | 0           | negative   | 9.9498     | positive      |
| 19      | 0           | negative   | 0          | negative      |
| 20      | 0           | negative   | 0          | negative      |
| 21      | 0           | negative   | 0          | negative      |
| 22      | 0           | negative   | 0          | negative      |
| 23      | 1.8255      | negative   | 75.6693    | positive      |
| 24      | 0           | negative   | 31.242     | positive      |
| 25      | 0           | negative   | 0          | negative      |
| 26      | 0           | negative   | 2.0184     | positive      |
| 27      | 0           | negative   | 0          | negative      |
| 28      | 0           | negative   | 2.8828     | negative      |
| 29      | 0           | negative   | 40.9878    | positive      |
| 30      | 0           | negative   | 41.1789    | positive      |
| 31      | 0           | negative   | 0          | negative      |
| 32      | 0           | negative   | 33.7404    | positive      |
| 33      | 2.0162      | no data    | 0          | negative      |
| 34      | 0           | negative   | 17.178     | positive      |
| 35      | 0           | negative   | 2.3271     | weak positive |
| 36      | 0           | negative   | 92.2369    | positive      |
| 37      | 0           | negative   | 0          | negative      |
| 38      | 0           | negative   | 0          | negative      |
| 39      | 0           | negative   | 0          | negative      |
| 40      | 0           | negative   | 75.1172    | positive      |
| 41      | 0           | negative   | 0          | negative      |
| 42      | 0           | negative   | 10.8802    | positive      |
| 43      | 0           | negative   | 0          | negative      |
| 44      | 0           | negative   | 0          | negative      |
| 45      | 0           | negative   | 0          | negative      |
| 46      | 0           | negative   | 62.6437    | positive      |
| 47      | 4.0243      | negative   | 7.5601     | positive      |
| 48      | 0           | negative   | 0          | negative      |
| 49      | 6.1227      | positive   | 0          | negative      |
| 50      | 0           | negative   | 42.9171    | positive      |
| 51      | 0           | negative   | 15.0372    | negative      |

|    |        |               |         |               |
|----|--------|---------------|---------|---------------|
| 52 | 0      | negative      | 33.6155 | positive      |
| 53 | 0      | negative      | 30.7091 | positive      |
| 54 | 0      | negative      | 85.7923 | positive      |
| 55 | 0      | negative      | 0       | negative      |
| 56 | 0      | negative      | 5.229   | weak positive |
| 57 | 0      | negative      | 80.0007 | positive      |
| 58 | 0      | negative      | 47.2241 | positive      |
| 59 | 7.0481 | positive      | 0       | negative      |
| 60 | 0      | negative      | 0       | negative      |
| 61 | 5.9652 | weak positive | 0       | negative      |
| 62 | 0      | negative      | 33.2578 | positive      |
| 63 | 0      | negative      | 0       | negative      |
| 64 | 0      | negative      | 12.8129 | negative      |
| 65 | 0      | negative      | 0       | positive      |
