# Supplementary material for: Activation of an endogenous retrovirus-associated long non-coding RNA in human adenocarcinoma
Source: PubMed Central journal article supplement (PMC4375928; doi:10.1186/s13073-015-0142-6), 2015-03-05
Supplement: 13073_2015_142_MOESM3_ESM.pdf [file 13073_2015_142_MOESM3_ESM.pdf]

Supplementary File 1: Full sequence alignments for EVADR locus.

**CLUSTAL alignment for MER48 LTR at EVADR locus**

**Human MER48 LTR:**

Position: chr6:71104329-71104716

Band: 6q13

```
Human          CTTACTGAAAGATTCTCCCC-GGGGCCTGAAAGTTTAAAGGGAATGAATAACTCCGCCCTC
Chimpanzee     CTTACTGAAAGATTCTC-CC-GGAGCCTGAAAGCTTAAGGGAATGAATAACTCCGCCCTC
Gorilla        CTTACTGAAAGATACTCCCC-GGGGCCTGAAAGCTTAAGGGAATGAATAACTCCGCCCTC
Orangutan      CCTGCTGAAAGATTCTCACC-GGGGCCTGAAAGCTTAAGAGAATGAATAACTCCGCCCTC
Gibbon         CCTACTGAAAGATTCTCCCT-GGGGCCTGAAAGCTTAAGGGAATGAATAACTCCGCCCTC
Baboon         CCTACGAAAGATTCTCCCCAGGGCCTGAAAGCTTAAGGGAATGAGTAACCTCCTCCCTC
Macaque        CCTACGAAAGATTCTCCCCAGGG-CCTGAAAGCTTAAGGGAATGAATAACTCCTCCCTC
Rhesus         CCTACGAAAGATTCTCCCCAGGG-CCTGAAAGCTTAAGGGAATGAATAACTCCTCCCTC
Marmoset       CTG-----
Squirrel_monkey CTCA-----
Tarsier        CCCA-----
Bushbaby       CCCA-----
Mouse_lemur    CCCA-----
```

```
Human          CTCAGGCCAGTCCCAAGGTGCAAGGCCACTTGTGCTAGCAGCATGCGTCAGCAAGATAG
Chimpanzee     CTCAGGCCAGTCCCAAGGTGCAAGGCCACTTGTGCTAGCAGCATGCGTCAGCAAGATAG
Gorilla        CTCAGGCCAGTCCCAAGGTGCAAGGCCACTTGTGCTAGCAGCATGCGTCAGCAAGATAG
Orangutan      CTCAGGCCAGTCCCAAGGTGCAAGGCCACTTGTGCTAGCAGCATGCGTCAGCAAGATAG
Gibbon         CTCAGGCCAGTCCCAAGGTGCAAGGCCACTTGTGCTAGCAGCATGCGTCAGCAAGATAG
Baboon         CTCAGGCCAGTCCCTCAGGCACAAAGCCACATGCGCTAGCAGTGTGCATCAGCAAGATAG
Macaque        CTCAGGCCAGTCCCTCAGGCACAAAGCCACATGCGCTAGCAGTGTGCATCAGCAAGATAG
Rhesus         CTCAGGCCAGTCCCTCAGGCACAAAGCCACATGCGCTAGCAGTGTGCATTAGCAAGATAG
Marmoset       -----
Squirrel_monkey -----
Tarsier        -----
Bushbaby       -----
Mouse_lemur    -----
```

```
Human          CAGAAGCAGGAAGAGAGCTGGCCGGAAGATATGTACCCTGTGAAGACCCAGAGAGAGGCC
Chimpanzee     CAGAAGCAGGAAGAGAGCTGGCCGGAACATATGTACCCTGTGAAGACCCAGAGAGAGGCC
Gorilla        CAGAAGCAGGAAGAGAGCTGGCCGGAAGATATGTACCCTGTGAAGACCCAGAGAGAGGCC
Orangutan      CAGAAGCAGGAAGAGAGCTGGCCGGAACATATATACCCTGTGAAGAC--AGAGAGAGGCC
Gibbon         CAGAAGCAGGAAGAGAGCTGGCCGGAAGATATGTACCCTGTGAAGACCCAGAGAGAGGCC
Baboon         CAGAAGCAGGAAGAGAGTTAGCCCAAAGACATGTACCCTGTGAAGACCCAGAGAGAGGCC
Macaque        CAGAAGCAGGAAGAGAGTTAGCCCAAAGACATGTACCCTGTGAAGACCCAGAGAGAGGCC
Rhesus         CAGAAGCAGGAAGAGAGTTAGCCCAAAGACATGTACCCTGTGAAGACCCAGAGAGAGGCC
Marmoset       -----
Squirrel_monkey -----
Tarsier        -----
Bushbaby       -----
Mouse_lemur    -----
```

```
Human          GTCCAGGTACCACGTAGCAGTTACATCAGACTGAGACACTTCTGTTTACAGGAGACTAT
Chimpanzee     GTCCAGGTACCACGTAGCAGTTACATCAGACTGAGACACTTCTGTTTACAGGAGACTAT
Gorilla        GTCCAGGTACCACGTAGCAGTTATATCAGACTGAGACACTTCTGTTTACAGGAGACTAT
Orangutan      ATCCAGGTACCACGTAGCAGTTACATCAGACTGAGACACTTCTGTTTACAGGAGACTAT
Gibbon         ATCCAGGTACCACGTAGCAGTTACATCAGACTGAGGCACTTCTGTTTACAGGAGACTAT
Baboon         GTCCAGGTACCACGTAGCAGTTACATCAGACTGAGACACTTCTGTTTACAGGAGACTAT
Macaque        GTCCAGGTACCACGTAGCAGTTACATCAGACTGAGACACTTCTGTTTACAGGAGACTAT
Rhesus         GTCCAGGTACCACGTAGCAGTTACATCAGACTGAGACACTTCTGTTTACAGGAGACTAT
Marmoset       -----
Squirrel_monkey -----
Tarsier        -----
Bushbaby       -----
Mouse_lemur    -----
```

```
Human          AAAACCCCTGCCCATCTCATTGGTGCTGATGCCATTTTACGCCCTCAGCACACCTGCA
Chimpanzee     AAAACCCCTGCCCATCTCATTGGTGCTGATGCCATTTTAAAGCCCTCAGCACACCTGCA
Gorilla        AAAACCCCTGCCCATCTCATTGGTGCTGATGCCATTTTAAAGCCCTCAGCACACCTGCA
Orangutan      AAAACCTCTGCCCATCTCATTGGTGCTGATGCCATTTTAGGCCCTCAGCACACCTGCA
Gibbon         AAAACCCCTGCCCATCTCATTGGTGCTGATGCCATTTTAAAGCCCTCAGCATGCCCTGCA
Baboon         AAAACCTCTGCCCATCTCATTGGTGCTGATGCCATTTTAGGCCCTCAGTCCGCCTGCA
Macaque        AAAACCTCTGCCCATCTCATTGGTGCTGATGCCATTTTAGGCCCTCAGCCTGCCTGCA
```

Rhesus AAAACCTCTGCCCGTCTCATTTGGTGCTGATGCCATTTTAGGTCTCAGCCCGCCTGCA  
Marmoset -----  
Squirrel\_monkey -----  
Tarsier -----  
Bushbaby -----  
Mouse\_lemur -----

Human CCCAGGCGCTCATTA AAAACAGCATGTTGCTCCCCACTGCCTCGTGTGTCTGTTGGCGCG  
Chimpanzee CCCAGGCGCTCATTA AAAACAGCATGCTGCTCCCCACTGCCTCGTGTGTCTGTTGGCGCG  
Gorilla CCCAGGCGCTCATTA AAAACAGCATGCTGCTCCCCACTGCCTCGTGTGTCTGTTGGTGCG  
Orangutan CCCAGGCGCTCATTA AAAACAGCATGTTGCTCCACACTGCCTCGTGTGTCTGTTGGCAGC  
Gibbon CCCAGGTGCTCATTA AAAACAGCATGTTGCTCCACACTGCCTCGTATTGTCTGTTGGCAGC  
Baboon CCCAGGCGCTCATTA AAAACAGCATGTTGCTCCACACTGCCTCGTGTGTCTGTTGGCGCG  
Macaque CCCAGGAGCTCATTA AAAACAGCATGTTGCTCCACACTGCCTCGTGTGTCTGTTGGAGCG  
Rhesus CCCAGGCGCTCATTA AAAACAGC-----CCACACTGCCTCGTGTGTCTGTTGGAGGG  
Marmoset -----  
Squirrel\_monkey -----  
Tarsier -----  
Bushbaby -----  
Mouse\_lemur -----

Human CTGTCGGGGTTCGAACCGATAACAAGAACCTTCCACCTACCTGGTGCCTTGGCCTCATCTA  
Chimpanzee CTGTCGGGGTTCGAACCGGTACAAGAACCTTTCACCTACCTGGTGCCTTGGCCTCATCTG  
Gorilla CTGTCGGGGTTCGAACCGATAACAAGAACCTTTCACCTACCTGGTGCCTTGGCCTCATCTA  
Orangutan CTGTCAGGGTTCGAACCCATAACAAGAACCTTTCACCTACCTGGTGCCTTGGCCTCATCTA  
Gibbon CTGTCAGGGTTCGAACCTGATAACAAGAACCTTTCACCTACCTGGTGCCTTGGCCTCATCTA  
Baboon CTCTCGGGATTCCAACCGATAACAAGAACCTTTCACCTACCTGGTGCCTTGGCCTCATCTA  
Macaque CTCTCGGGATTCCAACCGATAACAAGAACCTTTCACCTACCTGGTGCCTTGGCCTCATCTA  
Rhesus CTTTCGGGATTCCAACCGATAACAAGAACCTTTCACCTACCTGGTGCCTTGGCCTCATCTA  
Marmoset -----CCTAGTGCCTCAGTCTCATCTA  
Squirrel\_monkey -----CCTGGTGCCTCAGTCTCATCTA  
Tarsier -----CTAGGCATTTGGTTTCGTCTA  
Bushbaby -----AATGGTGCCTGATTTCTTCTG  
Mouse\_lemur -----CTTGGTGCCTCAGTTCCTTCTA

Human TAAGGTAAAAGCAAAGCCATCTGTTGCTAAATATTGGAACTCTGTGTAGCAGTGAAGAT  
Chimpanzee TAAGGTAAAAGCAAAGCCATCTGTTGCTAAATATTGGAACTCTGTGTAGCAGTGAAGAT  
Gorilla TAAGGTAAAAGCAAAGCCATCTGTTGCTAAATATTGGAACTCTGTGTAGCAGTGAAGAT  
Orangutan TAAGGTAAAAGCAAAGCCATCTGTTGCTAAATATTGGAACTCTGTGTAGCAGTGAAGAT  
Gibbon TAAGGTAAAAGCAAAGCCATCTGTTGCTAAATAT-GGAACTCTGTGTGGCAGTGAAGAT  
Baboon TAAAGTAAAAGCAAAGCCATCTGTTGTTAAATAT-GGAACTCTGTGTAGCAGTGAAGAT  
Macaque TAAAGTAAAAGCAAAGCCATCTGTTGTTAAATAT-GGAACTCTGTGTAGCAGTGAAGAT  
Rhesus TAAAGTAAAAGCAAAGCCATCTGTTGTTAAATAT-GGAACTCTGTGTAGCAGTGAAGAT  
Marmoset TAACGTAAAAGCAAAGCCATCTGTGGCTACATAT-GGAACTCTGTGTACCAGTGAAGAT  
Squirrel\_monkey TAAGGTAAAAGCAAAGCCATCTGTGGCTACCTAT-GGAACTCTGTGTACAAGTGAAGAT  
Tarsier TATGGTAAAAGCAACCCATCTGCAGCTAAGTACGGGAAG-TCAGTGTGGCAGTGAAGAT  
Bushbaby TAACCTAAGAGCAAAGCCAACCTGGGGCTAAATACAAGAAG-TCAGCATGGCAATGAGGAT  
Mouse\_lemur TAAGGTACAAGAAAAGCCATCTGCAGCTAAGTAGGAGAAG-TCATCCTGGCAGGAGGAT

Human TAGAAGTAG----TTAATGATTGGAGGATGAC  
Chimpanzee TAGAAGTAG----TTAATGATAGAAGGATGAC  
Gorilla TAGAAGTAG----TTAATGATAGAAGGATGAC  
Orangutan TAGGAGTAG----TTAATGATAGAAGGATGAC  
Gibbon TAGGAGTAG----TTAATGATAGAAGGATGAC  
Baboon -AGGAGTAG----TTAATGATAGAAGGATGAC  
Macaque TAGGAGTAG----TTAATGATAGAAGGATGAC  
Rhesus TAGGAGTAG----TTAATGATAGAAGGATGAC  
Marmoset TAGGTA-----TAATGATAGAAGGATGAC  
Squirrel\_monkey TAGGAA-----TAATGATAGAAGGATGAC  
Tarsier CAGAAGTAG----TTAATAATAGGAGGATGGC  
Bushbaby CAGAAGTAGATAGTTAATGATAGGAAG  
Mouse\_lemur CAGGAGTAG----CTAATGACAGGAGCTGGC

**CLUSTAL alignment for 394-nt EVADR cDNA**

**Human EVADR exon coords (chr6):**

exon 1: 71,104,593-71,104,746

exon 2: 71,104,933-71,104,969

exon 3: 71,108,918-71,109,120

```
Human          GATGCCATTTTCAGCCTCAGCACGCTGCACCCAGGCGCTCATTA AACAGCATGTT
Chimpanzee     GATGCCATTTTAAGCCTCAGCACACCTGCACCCAGGCGCTCATTA AACAGCATGCT
Gorilla        GATGCCATTTTAAGCCTCAGCACACCTGCACCCAGGCGCTCATTA AACAGCATGCT
Orangutan      GATGCCATTTTAGGCCTCAGCACGCTGCACCCAGGCGCTCATTA AACAGCATGTT
Gibbon         GATGCCATTTTATGCCTCAGCATGCCTGCACCCAGGCGCTCATTA AACAGCATGTT
Baboon         GATGCCATTTTAGGCCTCAGTCCGCTGCACCCAGGCGCTCATTA AACAGCATGTT
Macaque        GATGCCATTTTAGGCCTCAGCCTGCCTGCACCCAGGAGCTCATTA AACAGCATGTT
Rhesus         GATGCCATTTTAGGTCTCAGCCCCTGCACCCAGGCGCTCATTA AACAGCC----
Marmoset       -----
Squirrel_monkey -----
Tarsier        -----
Bushbaby       -----
Lemur          -----
```

```
Human          GCTCCCCTACTGCCTCGTGTGCTGTGGCGCGCTGTCGGGGTTCGA ACCGATACAAGAA
Chimpanzee     GCTCCCCTACTGCCTCGTGTGCTGTGGCGCGCTGTCGGGGTTCGA ACCGATACAAGAA
Gorilla        GCTCCCCTACTGCCTCGTGTGCTGTGGCGCGCTGTCGGGGTTCGA ACCGATACAAGAA
Orangutan      GCTCCACACTGCCTCGTGTGCTGTGGCACGCTGTCAGGGTTCGA ACCCATAACAAGAA
Gibbon         GCTCCACATCGCCTCGTATTGCTGTGGCACGCTGTCAGGGTTCGA ACTGATACAAGAA
Baboon         GCTCCACACCGCCTCTTGTGCTGTGGCGCGCTCCTCGGGATTCCA ACCGATACAAGAA
Macaque        GCTCCACACCGCCTCTTGTGCTGTGGAGCGCTCCTCGGGATTCCA ACCGATACAAGAA
Rhesus         ----CACACCGCCTCTTGTGCTGTGGAGGGCTTTCGGGATTCCA ACCGATACAAGAA
Marmoset       -----
Squirrel_monkey -----
Tarsier        -----
Bushbaby       -----
Lemur          -----
```

```
Human          CCTTCCACTACCTGGTGCTTTGGCCCTCATCTATAAGC-TTTTCCA CTGTCCTGAA----
Chimpanzee     CCTTTCACCTACCTGGTGCTTTGGCCCTCATCTGTAAGC-TTTTCCA CTGTCCTGAA----
Gorilla        CCTTTCACCTACCTGGTGCTTTGGCCCTCATCTATAAGC-TTTTCCA CTGTCCTGAA----
Orangutan      CCTTTCACCTACCTGGTGCTTTGGCCCTCATCTATAAGC-TTTTCCA CTGTCCTGAA----
Gibbon         CATTTACCTACCTGGTGCTTTGGCCCTCATCTATAAGC-TTTTCCA CTGTCCTGAA----
Baboon         ACTTTACCTACCTGGTGCTTTGGCCCTCATCTATAAAC-TTTTCTA CTGTCCTGAA----
Macaque        CATTTACCTACCTGGTGCTTTGGCCCTCATCTATAAAC-TTTTCTA CTGTCCTGAA----
Rhesus         CATTTACCTACCTGGTGCTTTGGCCCTCATCTATAAAC-TTTTCTA CTGTCCTGAA----
Marmoset       -----GCCTAGTGCTTTCAGTCTCATCTATAACC-TTTTCCA CTGTCCTGAA----
Squirrel_monkey -----ACTGGTGCTTTCAGTCTCATCTATAAGC-TTTTCCA CTGTCCTGAA----
Tarsier        -----ACTAGGCACCTTTGGTTTCGCTATATGCATTTTCCCCTG TCCTGAATGTA
Bushbaby       -----AAATGGTGCTCTGATTCTTCTGTAACC-TTTTCCAATGTCTG AATGTA
Lemur          -----ACTTGGTGCTTTCAGTTTCTTCTATAAG--TTTACCA ATGTCTGAATGTA
```

```
Human          ---ACAAGATAG-----AGAAATCTGAGCGGCCAGTCA TCTGCCCTAA
Chimpanzee     ---ACAAGATAG-----AGAAATCTGAGCGGCCAGTCA TCTGCCCTAA
Gorilla        ---GCAAGATAG-----AGAAATCTGAGCGGCCAGTCA TCTGCCCTAA
Orangutan      ---ACAAGGTAG-----AGAAATCTGAGCAGCCAGTCA TCTGCCCTAA
Gibbon         ---ACAAGGTAG-----AGAAATCTGAGCAGCCAGTCA TCTGCCCTAA
Baboon         ---ACAAGGTAG-----AGAAATCTGAGCAGCCAGTCA TCTGCCCTAA
Macaque        ---ACAAGGTAG-----AGAAATCTGAGCAGCCAGTCA TCTGCCCTAA
Rhesus         ---ACAAGGTAG-----AGAAATCTGAGCAGCCAGTCA TCTGCCCTAA
Marmoset       ---ACAAGATAG-----AGAAATCTAAGCACCAGTCA TCTGCCCTAA
Squirrel_monkey -----ACAAGATAG-----AGAAATCTAAGCAGCCAGTCA TCTGCCCTAA
Tarsier        GAAACAAGATGGTATATTTGGCCCTAGGATGGATAAATGAGCA ACCAGCAATCTTCCCTGA
Bushbaby       GAAACGAGATGGCAGATTGGCCCAAGGATAAGGAATTTGAGCAG CCAGAGATCTGCCCTGA
Lemur          GAAACGAGATAGCAGATTGGCCCAAGGATAGAGAATTTGAGCA ACCAATAATCTGCCCTAA
```

```
Human          GTGCTGCCGCCGAAGACTGAAATGTCCCTGGAAAGTTTGTGTGC ACATCTCCATTATGACAA
Chimpanzee     GTGCTGCCGCCGAAGACTGAAATGTCCCTGGAAAGTTTGTGTGC ACATCTCCATTATGACAA
Gorilla        GTGCTGCCGCCGAAGACTGAAATGTCCCTGGAAAGTTTGTGTGC ACATCTCCATTATGACAA
Orangutan      GTGCTGCCGCCGAAGACTGAAATGTCCCTGGAAAGTTTGTGTGC ACATCTCCATTATGACAA
Gibbon         GTGCTGTGTGCTGAAGACTGAAATGTCCCTGGAAAGTTTGTGTGC ACATCTCCATTATGACAA
Baboon         GTGCTGCCGCCGAAGACTGAAATGTCCCTGGAAAGTTTGTGTGC ACATCTCCATTATGACAA
Macaque        GTGCTGCCGCCGAAGACTGAAATGTCCCTGGAAAGTTTGTGTGC ACATCTCCATTATGACAA
Rhesus         GTGCTGCCGCCGAAGACTGAAATGTCCCTGGAAAGTTTGTGTGC ACATCTCCATTATGACAA
Marmoset       GTGCTGCCTCTGAAGACTGAAATATCCTGGAAATGTTTGTGTGC ACATCTCCATTATGACAA
Squirrel_monkey GTGCTGCCGCTGAAGACTGAAATGTCCCTGGAAATGTTTGTGTGC ACATCTCCATTATGACAA
```

Tarsier GTGTG-----TGAAGGCTGAATGCCCTAGAAAGTTTGCCTTCATATGTCC-----ACAA  
 Bushbaby GTGCCACGGCTGAAGGCTGAACGCCCTGGAGAGTTTGCCTCAGCTTCCCA-TACTACAG  
 Lemur GTGCTACGGCTGAAGGCTGAATGCCCGGAGAGTTTGCCTTCATATGTCC-----ACAA

Human AAGCATTGTGC---CGAACAG-----ATGAAAAATGCATTGTCAACGG  
 Chimpanzee AAGCATTGTGC---CGAACAG-----ATGAAAAATGCATTGTCAACGG  
 Gorilla AAGCATTGTGC---CGAACAG-----ATGAAAAATGCATTGTCAATGG  
 Orangutan AAGCATTGTGC---CGAACAG-----ATGAAAAATGCATTGTCAATGG  
 Gibbon AAGCATTGTGC---CGAACAG-----ATGAAAAATGCATTGTCAACGG  
 Baboon AAGCATTGTGC---CGAACAG-----ATGAAAAATGCATTGTCAATGG  
 Macaque AAGCATTGTGC---CGAACAG-----ATGAAAAATGCATTGTCAATGG  
 Rhesus AAGCATTGTGC---CGAACAG-----ATGAAAAATGCATTGTCAATGG  
 Marmoset AAGCATTGTGC---AGAACAG-----ATGAAAAATGCATTGTCAATGG  
 Squirrel\_monkey AAACATTGTGC---AGTACAG-----ATGAAAAATGCATTGTCAATAG  
 Tarsier AAGCATTGTGC---TTAAAG-----ATGAAACAA-ACATTGTCAATAA  
 Bushbaby AAGCATTGTGC---CAAACAG-----CAACAG  
 Lemur AAGCCCTTCTCTTTTAAACAGCATCGCTTGTATTATATAAAAGA-----TCAACAA

Human AATCTTTTATGTTTGTCTTCCCTTAAGCAACATTGCCTTACTTGTATAAAAAGATA  
 Chimpanzee AATCTTTTATGTTTGTCTTCCCTTAAGCAACATTGCCTTACTTGTATAAAAAGATA  
 Gorilla AATCTTTTATGTTTGTCTTCCCTTAAGCAACATTGCCT----TGTATAAAAAGATA  
 Orangutan AATCTTTTATGTTTGTCTTCCCTTAAGCAACATTGCCTTACTTGTATAAAAAGATA  
 Gibbon AATCTTTTATGTTTGTCTTCCCTTAAGCAACATTGCCTTACTTGTATAAAAAGATA  
 Baboon AATCTTTTATGTTTGTCTTCCCTTAAGCAACATTGCCT----TGTATAAAAAGATC  
 Macaque AATCTTTTATGTTTGTCTTCCCTTAAGCAACATTGCCT----TGTATAAAAAGATC  
 Rhesus AATCTTTTATGTTTGTCTTCCCTTAAGCAACATTGCCT----TGTATAAAAAGATC  
 Marmoset AATCTTTTATGTTTGTCTTCCCTTAAGCAACATTGCCT----TGTATAAAAAGATC  
 Squirrel\_monkey AATCTTTTATGTTTGTCTTCCCTTAAGCAACATTGCCTTGTATAAAAAGATC  
 Tarsier AATCTTTTATGTTTGTCTTCCCTTAAGCAACATTGCCTTGTATAAAAAGATC  
 Bushbaby AATCTTTTATGTTTGTCTTCCCTTAAGCAACATTGCCTTGTATAAAAAGATC  
 Lemur AATCTTTTATGTTTGTCTTCCCTTAAGCAACATTGCCTTGTATAAAAAGATC

Human AATAAATATTTGTTTCATTTCAA  
 Chimpanzee AATAAATATTTGTTTCATTTCAA  
 Gorilla AATAAATATTTGTTTCATTTCAA  
 Orangutan AATAAATATTTGTTTCATTTCAA  
 Gibbon AATAAATATTTGTTTCATTTCAA  
 Baboon AATAAATATTTGTTTCATTTCAA  
 Macaque AATAAATATTTGTTTCATTTCAA  
 Rhesus AATAAATATTTGTTTCATTTCAA  
 Marmoset AATAAATATTTGTTTCATTTCAA  
 Squirrel\_monkey AATAAATATTTGTTTCATTTCAA  
 Tarsier AATAAATATTTGTTTCATTTCAA  
 Bushbaby AATAAATATTTGTTTCATTTCAA  
 Lemur AATAAATATTTGTTTCATTTCAA

**CLUSTAL alignment for EVADR introns (i1 and i2 merged)**

**Human EVADR intron coords (chr6):**  
 intron 1(i1): 71,104,747-71,104,932  
 intron 2(i2): 71,104,970-71,108,917

Human GTAAAAGCAAAGCCATCTGTTGCTAAATATTGGAAACTCTGTGTAGCAGTGAAGATTAGA  
 Chimpanzee GTAAAAGCAAAGCCATCTGTTGCTAAATATTGGAAACTCTGTGTAGCAGTGAAGATTAGA  
 Gorilla GTAAAAGCAAAGCCATCTGTTGCTAAATATTGGAAACTCTGTGTAGCAGTGAAGATTAGA  
 Orangutan GTAAAAGCAAAGCCATCTGTTGCTAAATATTGGAAACTCTGTGTAGCAGTGAAGATTAGG  
 Gibbon GTAAAAGCAAAGCCATCTGTTGCTAAA-TATGGAAACTCTGTGTGGCAGTGAAGATTAGG  
 Baboon GTAAAAGCAAAGCCATCTGTTGTTAA-ATATGGAAACTCTGTGTAGCAGTGAAGATA-GG  
 Macaque GTAAAAGCAAAGCCATCTGTTGTTAA-ATATGGAAACTCTGTGTAGCAGTGAAGATTAGG  
 Rhesus GTAAAAGCAAAGCCATCTGTTGTTAA-ATATGGAAACTCTGTGTAGCAGTGAAGATTAGG  
 Marmoset GTAAAAGCAAAGCCATCTGTGGCTACA-TATGGAAACTCTGTGTACCAGTGAAGATTAGG  
 Squirrel\_monkey GTAAAAGCAAAGCCATCTGTGGCTACC-TATGGAAACTCTGTGTACCAGTGAAGATTAGG  
 Tarsier GTAAAAGCAAAGCCATCTGCAGCTAAG-TACGGGAAGTCAGTGTGGCAGTGAAGATTAGG  
 Bushbaby CTAAGAGCAAAGCCAACTGGGCTAAATACAAGA-AGTCAGCATGGCAATGAGGATTAGG  
 Lemur GTACAAGAAAAGCCATCTGCAGCTAAG-TAGGAGAAGTCATCGTGGCAGGGAGGATTAGG

Human AGT-----AGTTAATGATTGGAGGA-----TGACCCCT--CTCAAAAA-----A  
 Chimpanzee AGT-----AGTTAATGATTGGAGGA-----TGACCCCT--CTCAAAAA-----A  
 Gorilla AGT-----AGTTAATGATTGGAGGA-----TGACCCCT--CTCAAAAA-----A  
 Orangutan AGT-----AGTTAATGATTGGAGGA-----TGACCCCT--CTCAAAAA-----AAA  
 Gibbon AGT-----AGTTAATGATTGGAGGA-----TGACCCCT--CTCAAAAA-----AAA

Baboon AGT-----AGTTAATGATAGAAGGATGACCCCTCTCAAAAAA-A--AAAA---AGA  
Macaque AGT-----AGTTAATGATAGAAGGATGACCCCTCTCAAAAAA---AAAA---AGA  
Rhesus AGT-----AGTTAATGATAGAAGGATGACCCCTCTCAAAAAA---AAAA---AGA  
Marmoset TAT-----AATGATAGAAGGATGACCAGAGGTGACCCCTC--CCCC-GAA---AAA  
Squirrel\_monkey AAT-----AATGATAGAAGGATGACCAGAGGTGACCCCTC--CCCCCAA---AAA  
Tarsier AGTAGTTAATAATAGGAGGATGGCTAGAGGTGTCCTCTCTCAAAAGAA-----AAA  
Bushbaby AGTAGATAGTTAATGATAGGAAGATAGCCAGAGGTGTTCCCCCTCCACCCCTGCCAAA  
Lemur AGTAGCTAATGACAGGAGCCTGGCTGAGGTGTCCTCCCCCAAAAAA-----ACA

Human -A-----AAAAAGTTACATTGAGGGCCCCGAGACATTGAATGAAA  
Chimpanzee -A-----AAAAAGTTACATTGAGGGCCCCGAGACATTGAATGAAA  
Gorilla AA-----AAAAAGTTACATTGACGGCCGAGCAGACATTGAATGAAA  
Orangutan AA-----AAAAAGTTACATTGAGGGCCCCGAGCAGACATTGAATGAAA  
Gibbon AA-----AAAAAATTACATTGAGGGCCCCGAGCAGACATTGAATGAAA  
Baboon AA-----AAAAAGTTACATTGAGGGCCCCGAGCAGACATTGAATGAAA  
Macaque AA-----AAAAAGTTACATTGAGGGCCCCGAGCAGACATTGAATGAAA  
Rhesus AA-----AAAAAGTTACATTGAGGGCCCCGAGCAGACATTGAATGAAA  
Marmoset AT-----TGTAATTACATTGAGGGCCCCGAGCAGACATTGAATGAAG  
Squirrel\_monkey AT-----TGTAATTACATTGAGGGCCCCGAGCAGACATTGAATGAAG  
Tarsier A-----GTTTTTTGAAACGATATTGAGGTACCAACAGACATTGAATGAAA  
Bushbaby ACAGAAATCAACAACAAAAAACACCTTTTTTTAAAGCCATATAGAGAGCTC---ATA  
Lemur A-----CTTTT-TTAAGCCACATAGAGTGCTCAGTAAACATTTAATGAAA

Human AATA-----TGAACTCAAGTCAAAAAATTGTTTTTCGCA-TTTTTTCCAGCAGGTA  
Chimpanzee AATA-----TGAACTCAAGTCAAAAAATTGTTTTTGCA-TTTTTTCCAGCAGGTA  
Gorilla AATA-----TGAACTCAAGTAAAAAACTGTTTTTGCA-TTTTTTCCAGCAGGTA  
Orangutan AATA-----TGAACTCAAGTCAAAAAATTGTTTTTGCA-TTTTTTCCAGCAGGTA  
Gibbon GATA-----TGAACTCAAGTCAAAAAATTGTTTTTGCA-ATTTTTTCCAGCAGGTA  
Baboon AATA-----TGAACTCAAGTAAAAAAATTTT--TTGCAT-TTTTTTCCAGCAGGTA  
Macaque AATA-----TGAACTCAAGTAAAAAAATTTT--TTGCAT-TTTTTTCCAGCAGGTA  
Rhesus AATA-----CGAACTCAAGTAAAAAAATTTT--TTGCATTTTTTTTTCCAGCAGGTA  
Marmoset ACTA-----TAAACTCAAGTCAAAAAATTTTTCTGCATTTTTTTGCGCAGCAGATA  
Squirrel\_monkey GCTA-----TAAACTCAAGTCAAAAAATTTTTCAGCATTTT--TTTCCAGCAGGCA  
Tarsier ACTATGAACCTGTAGTATTGCAAGTCAAAAAATGCTTTTGCATTTTTCTTCCAGCAAGCA  
Bushbaby AACAA-----TTTTAATGAAAAGT-AAGAAGTGCTTTTTCTTTTTCTCCAGCAAGTA  
Lemur TATGTGAACCTGCTTTTTGCACCTTTTTCCAGCAA-CFTT---ACCAATGTCCTGAAGGTA

Human AGATATGATCTGAAAAATGTTTGACATGGCTGCTTTTTGCCATAAAAACAAAGTAGAAAAAT  
Chimpanzee AGATATGGTATGAAAAATGTTTGACATGGCTGCTTTTTGCCATAAAAACAAAGTAGAAAAAT  
Gorilla AGATATGGTATGAAAAATGTTTGACATGGCTGCTTTTTGCCATAAAAACATAGTAGAAAAAT  
Orangutan AGATATGGTATGAAAAATGTTTGACATGGCTGCTTTTTGCCATAAAAACAAAGTAGAAAAAT  
Gibbon AGATATGGTATGAAAAATGTTTGACATGGCTGCTTTTTGCCATAAAAACAAAGTAGAAAAAT  
Baboon AGATATGGCATGAAAAATGTTTGACATGGCTACTTTTTGCCGTAAACAGAAAGTAGAAAAAT  
Macaque AGATATGGCATGAAAAATGTTTGACATGGCTACTTTTTGCCGTAAACAGAAAGTAGAAAAAT  
Rhesus AGATATGGCATGAAAAATGTTTGACATGGCTACTTTTTGCCGTAAACAGAAAGTAGAAAAAT  
Marmoset AGATATGGCATGAAAAATGTTTAAACATAGCTACTTTTTGCCATAG-AACAAAGAGAAAAAT  
Squirrel\_monkey ATATATGGCATGAAAAATGTTTGACATGGCTACTTTTTGCCATAG-AACAAAGAGAAAAAT  
Tarsier AGATATGGCATGAAAAATTTGACATGGCTACTGTTGCCTTAAACA-GAGTAGAAAAAT  
Bushbaby AGATCGCCCTGAAAAATTTTTAACATGGCAATTTTTGCCATAACACA-AAGTAGAAAAAT  
Lemur AGACAAGGCATGAAAAATTTTTAACATGACTGCTTTTTGCCATAAAACA-AACTAGAAAAAT

Human AATTAATGTAG-TCCATTTCTAGAGTTACCT-AAGTGTAGTGTGGCTTATAAGACAGA  
Chimpanzee AATTAATGTAG-TCCATTTCTAGAGTTACCTGAAGTGTAGTGTGGCTTATAAGACAGA  
Gorilla AATTAATGTAG-TCCATTTCTAGAGTTACCTGAAGTGTAGTGTGGCTTATAAGACAGA  
Orangutan AATTAATGTAG-TCCATTTCTAGAGTTACCTGAAGTGTAGTGTGGCTTATAAGACAGA  
Gibbon AATTAATGTAG-TCCATTTCTAGAGTTACCTAAAGTGTAGTGTGGCTTATAAGACAGA  
Baboon AATTAAGTAGTTCATTTCTAGCGTTACCTAAAGTGCAGTGTGGCTTATAAGACAGA  
Macaque AATTAAGTAGTTCATTTCTAGCGTTACCTAAAGTGCAGTGTGGCTTATAAGACAGA  
Rhesus AATTAAGTAGTTCATTTCTAGCGTTACCTAAAGTGCAGTGTGGCTTATAAGACAGA  
Marmoset AATTAATGTAA-TCCATTTCAAGAGTACCACAAGTGTAGTGTGGCTTATAAGACAGA  
Squirrel\_monkey AATTAATGTAG-TCCATTTCAAGAGTACCACAAGTGTAGTGTGGCTTATAAGACGGA  
Tarsier AATTAATGTAG-T---ATACAAGACTTATCTAAAGTGTAGTGTGGCTTGTGAGACGGA  
Bushbaby AATTAATGTAG-T---TGAGTACATTACCTAACGTGTAGCTTGTGGCTTATGAGACAGA  
Lemur AATTAATGTAG-TCCATTTCAAGAGTACCACAAGTGTAGTGTGGCTTATGAGACAGA

Human ATACCTGGACCTGCCTCATGTGTGCCTATTGTTTGTGCTGAAAGGATTTTAACTCCTATAAT  
Chimpanzee ATACCTGGACCTGCCTCATGTGTGCCTATTGTTTGTGCTGAAAGGATTTTAACTCCTATAAT  
Gorilla ATACCTGGACCTGCCTCATGTGTGCCTATTGTTTGTGCTGAAAGGATTTTAACTCCTATAAT  
Orangutan ATACCTGGACCTGCCTCATGTGTGCCTATTGTTTGTGCTGAAAGGATTTTAACTCCTATAAT  
Gibbon ATACCTGGACCTGCCTCATGTGTGCCTATTGTTTGTGCTGAAAGGATTTTAACTCCTATAAT  
Baboon ATACCTGGACCTGCCTCATGTGTGCCTATTGTTTGTGCTGAAAGGATTTTAACTCCTATAAT  
Macaque ATACCTGGACCTGCCTCATGTGTGCCTATTGTTTGTGCTGAAAGGATTTTAACTCCTATAAT  
Rhesus ATACCTGGACCTGCCTCATGTGTGCCTATTGTTTGTGCTGAAAGGATTTTAACTCCTATAAT

Marmoset ATACCTGGACCTGTCTCATGTGTGCCTGTCTGTTTGTCTGAAAGTATTTAATCCTATAAT  
Squirrel\_monkey ATACCTGGACCTGTCTCATGTGTGCCTATTGTTTGCAGAAAGGATTTAATCCTATAAT  
Tarsier ATACCTGGAACCTGCATCA--GATCTCTATTGTTTCTGAAAGGATTTAATCCTATAAT  
Bushbaby ATACCTGGACCTGCCTAA--TGTCCCTATTGTTGGCTGAAAAGTTTTAATCCAATAAT  
Lemur ATACCTGGACCTGCCTAA--CGCCCTATTGTTTGTCTGAAAGGTTTTAATCCTATAAT

Human AAAATCTCTCACAAACATGCCATGGAAAGTATTTCTAGAATCTTAAAAAC TAATGAGAA  
Chimpanzee AAAATCTCTCACAAACATGCCATGGAAAGTATTTCTAGAATCTTAAAAAC TAATGAGAA  
Gorilla AAAATCTCTCACAAACATGCCATGGAAAGTATTTCTAGAATCTTAAAAAC TAATGAGAA  
Orangutan AAAATCTCTCACAAACATGCCATGGAAAGTATTTCTAGAATCTTAAAAAC TAATGAGAA  
Gibbon AAAATCTCTCACAAACATGCCATGGAAAGTATTTCTAGAATCTTAAAAAC TAATGAGAA  
Baboon AAAATCTCTCACAAACATGCCATGGAAAGTATTTCTAGAATCTTAAAAAC TAATGAGAA  
Macaque AAAATCTCTCACAAACATGCCATGGAAAGTATTTCTAGAATCTTAAAAAC TAATGAGAA  
Rhesus AAAATCTCTCACAAACATGCCATGGAAAGTATTTCTAGAATCTTAAAAAC TAATGAGAA  
Marmoset AAAATCTCTCAAAACGTGCCATGGAAAGTATTTCTAGAATCTTAAAAAC TAGTAAGAA  
Squirrel\_monkey AAAATCTCTCAAAACGTGCCATGGAAAGGATTTCTAGAATCTTAAAAAC TAATGAGAA  
Tarsier AAAATCTCTCAGCATATGATGGAAAGTATTTCTAGAATTTTTAAACAC TAATGAGAA  
Bushbaby GAAATCTCTTACAGCATACTATGGAAAGTATTTCTAGAATTTTTAAAAAC TAATGAGAA  
Lemur AAAATCTCTCAGCATACTATGGAAAGTATTTCTAGAATTTTTAAAAAC TAATGAGAA

Human GGAAGCTTGAATATGCTGATTAACATGGAAGCTTGTACTGGAAAAGAAAAGCAAACCTG  
Chimpanzee GGAAGCTTGAATATGCTGATTAACATGGAAGCTTGTACTGGAAAAGAAAAGCAAACCTG  
Gorilla GGAAGCTTGCATATGCTGATTAACATGGAAGCTTGTACTGGAAAAGAAAAGCAAACCTG  
Orangutan GGAAGATTGAATATGCTCATTAAACATGGAAGCTAGTTACTGGAAAAGAAAAGCAAACCTG  
Gibbon GGAAGCTTGAATATGCTGATTAACATGGAAGCTAGTTACTGGAAAAGAAAAGCAAACCTG  
Baboon GGAAGCTTGAACATGCTGATTAACATGGAAGCTAGTTACTGGAAAAGAAAAGCAAACCTG  
Macaque GGAAGCTTGAACATGCTGATTAACATAGAAGCTAGTTACTGGAAAAGAAAAGCAAACCTG  
Rhesus GGAAGCTTGAACATGCTGATTAACATAGAAGCTAGTTACTGGAAAAGAAAAGCAAACCTG  
Marmoset GGAAGCTTGAATATGCTGATTAACAGAGAAGCTAGTTACTGGAAAAGAAAAGCAAAGTTG  
Squirrel\_monkey GGAAGCTTGAATATGCTGATTAACAGAGAAGCTAGTTACTGGAAAAGAAAAGCAAAGTTG  
Tarsier GGAAGCTTGAATATGCTGATTAACATCTAAGTTAGTTATTGGAAAAGAAAAGCAAAGTTG  
Bushbaby GGAAGCTTGAATATGCTGATTAATGTCAAGCGAGTTATTGGACAAGAAAAGCAAAGTTG  
Lemur GGAAGCTTGAATATGCTGATTAACGTGTAAGCTAGTTACTGGAAAAGAAAAGCAAAGTTG

Human AAAGATATTGTTTTAATATCCT-----TTCAGCTACTCTAAAAGATTACATAACTGCAC  
Chimpanzee AAAGATATTGTTTTAATATCCT-----TTCAGCTACTCTAAAAGATTACATAACTGCAC  
Gorilla AAAGATATTGTTTTAATATCCT-----TTCAGCTACTCTAAAAGATTACATAACTGCAT  
Orangutan AAAGATATTGTTTTAATATCCT-----TTCAGCTACTCTAAAAGATTGCATAACTGAAT  
Gibbon AAAGATATTGTTTTAATATCCT-----TTCAGCTACTCTAAAAGATTACCTAACTGAAT  
Baboon AAAGATATTGTTTTAATATCCT-----TTCAGCTACTCTAA--GATTACATAACTGAAT  
Macaque AAAGATATTGTTTTAATATCCT-----TTCAGCTACTCTAA--GATTACATAACTGAAT  
Rhesus AAAGATATTGTTTTAATATCCT-----TTCAGCTACTCTAA--GATTACATAACTGAAT  
Marmoset AAAGATATTG--TTAATATCCT-----TTCAGCTACTCTAAAAGATTATATAACTGAAT  
Squirrel\_monkey AAAGATATTG--TTAATATCCT-----TTCAGCTACTCTAAAAGATTATTTAACTGAAT  
Tarsier AAAGATATTGTTTTAATATCCT-----TTTCAGCTACTCTAAAAGATTACATAACTGACT  
Bushbaby AAAGATCATTGTTTTAATATCCTTTCTTTCAGCTACTCTGAAAAGATTACATAACTGATT  
Lemur AAAGATCATTGTTTTAATATCCT----TTTCAGCTACTCTAAAAGATTACATATCTGATT

Human ATAGAACAAGCTATATAAAGTACAAGGCTTAGTCAAAGAAACATCAGGCTAATACCTGAG  
Chimpanzee ATAGAACAAGCTATATAAAGTACAAGGCTTAGTCAAAGAAACATCAGGCTAATACCTGAG  
Gorilla ATAGAACAAGCTATATAAAGTACAAGGCTTAGTCAAAGAAACATCAGGCTAATACCTGAG  
Orangutan ATAGAACAAGCTATATAAAGTACAAGGCTTAGTCAAAGAAACATCAGGCTAATACCTGAG  
Gibbon ATAGAACAAGCTATATAAAGTACAAGGCTGAGTCAAAGAAACATCAGGCTAATACCTGAG  
Baboon ATAGAACAAGCTATATAAAGTACAAGGCTTAGTAAAAGAAACATCAGGCTAATACCTGAG  
Macaque ATAGAACAAGCTATATAAAGTACAAGGCTTAGTAAAAGAAACATCAGGCTAATACCTGAG  
Rhesus ATAGAACAAGCTATATAAAGTACAAGGCTTAGTAAAAGAAACATCAGGCTAATACCTGAG  
Marmoset ATAGAACAAGCTATGTAAGTACAAGGCTTAGTCAAAGAAACATCAGGCTAATACCTGAG  
Squirrel\_monkey ATAGAACAAGCTATAGTAAGTACAAGGCTTAGTCAAAGAAATATCAGGCTAATACCTGAG  
Tarsier ATAGAACAAGCTATATAAAGCACAAGGCTTAGTCAAAGAAATATCAGTCTAATACCTGAG  
Bushbaby ATAGAACAAGTTCTATATAAAGACAAGGCTTAGTCAAAGAAATATCAT--CTCATACCTGAG  
Lemur ATAGAACAAGTTATATAAAGTACAAGGCTTAGTCAAAGAAATATCAGTCTCATACCTGTA

Human TTTTCATACTTAATACAAAAGTCTAAAATATTTCTTAC--CCCCGACCTGAATATGGCTT  
Chimpanzee TTTTCATACTTAATACAAAAGTCTAAAATATTTCTTAC--CCCCGACCTGAATATGGCTT  
Gorilla TTTTCATACTTAATACAAAAGTCTAAAATATTTCTTAC--CCCCGACCTGAATATGGCTT  
Orangutan TTTTCATACTTAGTACAAAAGTCTAAAATATTTCTTAC--CCCCGACCTGAATATGGCTT  
Gibbon TTTTCATACTTAGAACAAAAGTCTAAAATATTTCTTAC--TCCCGACTGAATATGGCTT  
Baboon TTTTCATACT-----TATGGCTT  
Macaque TTTTCATACT-----TATGGCTT  
Rhesus TTTTCATACT-----TATGGCTT  
Marmoset TTTTCATACTTAGTACGAAAGTCTAAAATATTTT-TGC--CCCCAACCTGAATATGGCTT  
Squirrel\_monkey TTTTCATACATAGTACAAAAGTCTAAAAGTATTTTTTAC--CCCCAACCTGAATATGGCTT  
Tarsier TTTTCAGACTTAATATAAAGTCTTAAAGATTTTTTTTATCCCTTCTTGAATATCACTT

Bushbaby TTTTCCTACTTAGTATAAAATGCTAGATTTTTTTTA-C--CCTCCAACCTTTATATGGCTT  
Lemur TTTTCATACTTAGTATAAAAAGTCTAGAGACTTTATCCCCACCTAAATAGTCTTAAAAAT

Human CAACTTCTCATACAATGTAAGTACTACTAGCCTAATAGATATTTTAGAATTAATTTATTGCAAGT  
Chimpanzee CAACTTCTCATACAATGTAAGTACTACTAGCCTAATAGACATTTTAGAATTAATTTATTGCAAGT  
Gorilla CAACTTCTCATACAATGTAAGTACTACTAGCCTAATAGACATTTTAGAATTAATTTATTGCAAGT  
Orangutan AAAGTCTCATACAATGTAAGTACTACTAGCCTAATAGACATTTTAGAATTAATTTATTGCAAGT  
Gibbon AAAATTTCTCATACAATGTAAGTACTACTAGCCTAATAGACATTTTAGAATTAATTTATTGCAAGT  
Baboon AAAGTCTCATACAATGTAAGTACTACTAGCCTAATAGACATTTTAGAATTAATTTATTGCAAGT  
Macaque AAAGTCTCATACAATGTAAGTACTACTAGCCTAATAGACATTTTAGAATTAATTTATTGCAAGT  
Rhesus AAAGTCTCATACAATGTAAGTACTANNNNNNNNNNNNNNNNNNNNNNNNNNNNNNNNNNNNNNNN--  
Marmoset AAAGTTTTCTCATACAATGTAAGTACTACTAGCCTCATAGACATTTTAGAATTAATTTATTGCAAGT  
Squirrel\_monkey AAAGTTTTCTCATACAATGTTTCTACTGGCTAATAGACATTTTAGAATTAATTTATTGCAAGT  
Tarsier AAAGTCTCATACAATGTAAGTACTACTGGCTAATAGACATTTTATAATTAATTTATTGCAAGT  
Bushbaby GAAATTTCCATACAATGTAAGTACTACTAGCAA---AGACATTTTAGAATTAATTTATTGCAAGT  
Lemur TCCCATACA-----TGCTTTACT--ACATATAGACATTCTAGA-----

Human AGTTCATGTATATAAATGCATTTTTATTTCAACTTTAA-----  
Chimpanzee AGTTCATGTATATAAATGCATTTTTATTTCAACTTTAA-----  
Gorilla AGTTCATGTATATAAATGCATTTTTATTTCAACTTTAA-----  
Orangutan AGTTCATGTAGATAAATGCATTTTTATTTCAACTTTAA-----  
Gibbon AGTTCATGTAGATAAATGCATTTTTATTTCAACTTTAA-----  
Baboon AGTTCATGGAGATAAGTGCATTTTTATTTCAACTTTAA-----  
Macaque AGTTCATGGAGATAAGTGCATTTTTATTTCAACTTTAA-----  
Rhesus -----  
Marmoset AGTTCATGTAGATAAATGCATTTTTATTTCAACTTTAA-----  
Squirrel\_monkey AGTTCATGTAGATAAATGCATTTTTATTTCAACTTTAA-----  
Tarsier AGTTTTGTGTATCTAAATGCATTT-----TTGTTCAACTTT  
Bushbaby AGTTTTGGGTAGATAAATGAATTTTTTTTATTTTGGATAAATGAGTTTTTGTTCACACTTT  
Lemur -----

Human -----GTAGT--TTGTTTCATTGTTTTGAGTATAAATAAGCAATCTCATCAATGATC  
Chimpanzee -----GTAGT--TTGTTTCATTGTTTTGAGTATAAATAAGCAATCTCATCAATGATC  
Gorilla -----GTAGT--TTGTTTCATTGTTTTGAGTATAAATAAGCAATCTCATCAATGATC  
Orangutan -----GTAGT--TTGTTTCATTGTTTTGAGTATAAATAAGCAATCTCATCAATGATC  
Gibbon -----GTAGT--TTGTTTCATTGTTTTGAGTATAAATAAGCAATCTCATCAATGATC  
Baboon -----GTAGT--TTGTTTCATTGTTTTGAGTATAAATAAGCAATCTCATCAATGATC  
Macaque -----GTAGT--TTGTTTCATT-----TGAGTATAAATAAGCAATCTCATCAATGATC  
Rhesus -----NN  
Marmoset -----GTAGT--TTGTTTCATTGTTTTGAGTATAAATAAGCAATCTCATCAATGACC  
Squirrel\_monkey -----GTAGT--TTGTTTCATTGTTTTGAGTATAAATAAGCAATCTCATCAATGACC  
Tarsier GACATTAAGTTGTTTGTGAAGTTGTTTTGAGTGCAACTAGGCAATCTCTTCAATGATC  
Bushbaby GACATTAAGTTGTTTGTGAAGTTGTTTTGAGTATATTTAGGCAATCTCTTCAATGATC  
Lemur -----

Human ACTTCAAAGATACAGTTTATTTAAATATCTTAATCATTATTCACAAAGCATTATAGGATTA  
Chimpanzee ACTTCAAAGATACAGTTTATTTAAATATCTTAATCATTATTCACAAAGCATTATAGGATTA  
Gorilla ACTTCAAAGATACAGTTTATTTAAATATCTTAATCATTATTCACAAAGCATTATAGGATTA  
Orangutan ACTTCAAAGATACAGTTTATTTAAATATCTTAATCATTATTCACAAAGCATTATAGGATTA  
Gibbon ACTTCAAAGATACAGTTGATTAAATATCTTAATCATTATTCACAAAGCATTATAGGATTA  
Baboon ACTTCAAAGATACAGTTTATTTAAATATCTTAATCATTATTCACAAAGCATTATAGGATTA  
Macaque ACTTCAAAGATACAGTTTATTTAAATATCTTAATCATTATTCACAAAGCATTATAGGATTA  
Rhesus NNNNNNNNNNNNNNNNNNNNNNNNNNNNNNNNCTTAATCATTATTCACAAAGCATTATAGGATTA  
Marmoset ATTTGAAAGATACAGTTTATTTAAATATCTTAATCATTATTCATAAAGTATTATAGGAATTA  
Squirrel\_monkey ATTTCAAAGATACAGTTTATTTAAATATCTTAATCATTATTCATAAAGCATTATAGGATTA  
Tarsier ATTTCAAAGATATGCTTTTATTTAAATATTTTAAATCATTATTCACAAAACAACATTGTAAAG  
Bushbaby ATTTCAAAGATATAATTAGTTAAATATCTTAATCATTATTCACAAAGCATTATACGA  
Lemur -----

Human TTAGTA---AAGCTCCCTAATAGATAGTATTATTATTTTCACTCTTTCCAAGGAGTCAGT  
Chimpanzee TTAGTA---AAGCTCCCTAATAGATAGTATTATTATTTTCACTCTTTCCAAGGAGTCAGT  
Gorilla TTAGTA---AAGCTCCCTAATAGATAGTATTATTATTTTCACTCTTTCCAAGGAGTCAGT  
Orangutan TTAGTA---AAGCTCCCTAATAGATAGTATTATTATTTTCACTCTTTCCAAGGAGTCAGT  
Gibbon TTAGTA---AAGCTCCCTAATAGATAGTATTATTATTTTCACTCTTTCCAAGGAGTCAGT  
Baboon TTAGTA---AAGCTCCCTAATAGATAGTATTATTATTTTCACTCTTTCCAAGGAGTCAGT  
Macaque TTAGTA---AAGCTCCCTAATAGATAGTATTATTATTTTCACTCTTTCCAAGGAGTCAGT  
Rhesus TTAGTA---AAGCTCCCTAATAGATAGTATTATTATTTTCACTCTTTCC--CAGGAGTCAGT  
Marmoset TCAGTA---AAGTCCCTAATAGATAGTACTATTATTATTTTCACTCTTTCCAAGGAGTCAGT  
Squirrel\_monkey TCAGTA---AAGTCCCTAATAGATAGTACTATTATTATTTTCACTCTTTCCAAGGAGTCAGT  
Tarsier TTAATAGTAAAGCTCCCTAATAGAGCGTATCATTATTTTCACTCTTTCCAAGGAGTCAGT  
Bushbaby TTAAGTAAAGCTCCCTAATAGATAGTACTATTATTATTTTCACTCTTTCCAAGGAGTCAGT  
Lemur -----

Human TGTC AATATAAAAAATACGTTTAGAGAATGGGT CAGTAAAGCAGCAATTTGAAT---AA  
Chimpanzee TGTTAATATTAAAAAATATGTTTAGAGAATGGGT CAGTAAAGCAGCAATTTGAAT---AA  
Gorilla TGTC AATATAAAAAATATGTTTAGAGAATGGGT CAGTAAAGCAGCAATTTGAAT---AA  
Orangutan TGTC AATATAAAAAATATGTTTAGAGAATGGGT CAGTAAAGCAGCGATTTGAAT---AA  
Gibbon TGTC AATATAAAAAATATGTTTAGAGAATGGGT CAGTAAAGCAGCGATTTGAAT---AA  
Baboon TGTC AATATAAAAAATATGTTTAGAGAATGGGT CAGTAAAGTAGCGATTTGAAT---AA  
Macaque TGTC AATATAAAAAATATGTTTAGAGAACGGGT CAGTAAAGCAGCGATTTGAAT---AA  
Rhesus TGTC AATATAAAAAATATGTTTAGAGAACGGGT CAGTAAAGCAGCGATTTGAAT---AA  
Marmoset CATCAATATAAAAAATATGTTTAGAGAATGGGT CAGTAAAGCAACAAATTTGAAGGATAA  
Squirrel\_monkey TGTC AATATAAAAAATGATGTT CAGAGAATGGGT CAGTAAAGCAGCGATTTGAAGGATAA  
Tarsier TGTC AATATAAAAAATATGTTTAGGACATTTGTCAGTGAAGGAGGACAAGACAAT---  
Bushbaby TGTCGACATAAACAAATATGTTTAGGAAA-GGGGTT-----  
Lemur -----

Human TGAAGGATATTTGAACGATTGAAGGATAATGAATCAAACCTGAGGCAAAACAAAGGAAGTGA  
Chimpanzee TGAAGGATATTTGAACGATTGAAGGATAATGAATCAAACCTGAGGCAAAACAAAGGAAGCGA  
Gorilla TGAAGGATATTTGAACGATTGAAGGATAATGAATCAAACCTGAGGCAAAACAAAGGAAGTGA  
Orangutan TGAAGGATATTTGAATGATTGAAGGATAATGAATCAAACCTGAGGCAAAACAAAGGAAGTGA  
Gibbon TGAAGGATATTTGAACGACTGAAGGATAATGAATCAAACCTGAGGCAAAACAAAGGAAGTGA  
Baboon TGAAGGATATTTGAACGATTGAAGGATAATGAATCAAACCTGAGGCAAAACAAAGGAAGTGA  
Macaque TGAAGGATATTTGAACAAATGAAGGATAATGAATCAAACCTGAGGCAAAACAAAGGAAGTGA  
Rhesus TGAAGGATATTTGAACAAATGAAGGATAATGAATCAAACCTGAGGCAAAACAAAGGAAGTGA  
Marmoset TGAAGAATATTTGAATGACTGAAGGATAATGAATCAAACCTGAGGCAAAACAAAGGAAGTGA  
Squirrel\_monkey TGAAGAATATTTGAATGACTGAAGGATAATGAATCAAACCTGAGGCAAAAC---GAAGTGA  
Tarsier -----TTATTGAAGAATAATGAATGGAGGTAACAGAGGAAATGA  
Bushbaby ---GGTGAAGACGACTTATTGAAGGATAAAGACTCAAATCGAGGCCAACACAGGAAGTGA  
Lemur -----

Human GAATGAAGAATAAAGTGATGTAAGAATAATATAAGAATAGTAAGGAGCATTTTATATAAA  
Chimpanzee GAATGAAGAATAAAGTGATGTAAGAATAATATAAGAATAGTAAGGAGCATTTTATATAAA  
Gorilla GAATGAAGAATAAAGTGATGTAAGAATAATATAAGAATAGTAAGGAGCATTTTATATAAA  
Orangutan GAATGAAGAATAAAGTGATGTAAGAATAATATAAGAATAGTAAGGAGCATTTTATATAAA  
Gibbon GAATGAAGAATAAAGTGATGTAAGAATAATATAAGAATAGTAAGGAGCATTTTATATAAA  
Baboon AAATGAAGAATAAAGTGATGTAAGAATAACTGTGAAGAATAGTAAGGAGCATTTTATATAAA  
Macaque AAATGAAGAATAAAGTGATGTAAGAATAACTGTGAAGAATAGTAAGGAGTATTTTATATAAA  
Rhesus AAATGAAGAATAAAGTGATGTAAGAATAACTGTGAAGAATAGTAAGGAGTATTTTATATAAA  
Marmoset GAATGAA--ATAAAGTAATGTCAATAATTAATATAAGAATAGTAAGGAGCATTTTATATAAA  
Squirrel\_monkey GAATGAA--ATAAAGTAATGTCAATAATTAATATAAGAATAGTAAGGAGCATTTTATATAAA  
Tarsier GAACGAAGAACAAGCAATGTCAAGAATCAATGTGAAGAACAATCAAGTGTGTTTATATAAA  
Bushbaby GAACGAAGAATCA--AGGTATAAAGAATAATATAAGTAATGGTGAGGTGCATTTTATATAAA  
Lemur -----

Human TAAACCGTTAAAAGCAAGTTCCTTCACAATAAACAAACTCTGAACAATGAGTCTATGAGGA  
Chimpanzee TAAACTGTTAAAAGCAAGTTCCTTCACAATAAACAAACTCTGAACAATGAGTCTATGAGGA  
Gorilla TAAACTGTTAAAAGCAAGTTCCTTCACAATAAACAAACTCTGAACAAGAGTCTATGAGGA  
Orangutan TAAACTGTTAAAAGCAAAATTCCTTCACAATAAACAAACTCTGAACAATGAGTCTATGAGGA  
Gibbon TAAACTGTTAAAAGCAAGTTCCTTCACAATAAACAAACTCTGAACAATGAGTCTATGAGGA  
Baboon CAAACTGTCAAAGCAAAATTCCTTCACAATAAACAAACTCTGAACAATAAGTCTATGAGGA  
Macaque CAAACTGTCAAAGCAAAATTCCTTCACAATAAACAAACTCTGAACAATAAGTCTATGAGGA  
Rhesus CAAACTGTCAAAGCAAAATTCCTTCACAATAAACAAACTCTGAACAATAAGTCTACGAGGA  
Marmoset TAAACTGTTAAAAGTAAACTGTTTCACAATAAACAAACTCTGAACAATGAGTCTGTGAGGA  
Squirrel\_monkey TAAACTGTTAAAATCAAACATAATTCACAATAAACAAACCTGAACAATGAGTCTGTGGGGA  
Tarsier TAAAACCTTACAAGGCAACTTCCTTCAGATAAATAAGCTCTAAAACAACGAGTCTATGAGGT  
Bushbaby TAAAATTTGTAAGGCAAAATTTTTCAGATAAACAAGCTCTAAAACAATGAGTCTCCAAGGA  
Lemur -----

Human GCTGCCACTGAACTT-TAAGTTGCTCAAACACACTAACTGTGGAAG----AGTAGTACAA  
Chimpanzee GCTGCCACTGAACTT-GAAGTTGCTCAAACAC----ACTGTGGAAG----AGTAGTACAA  
Gorilla GCTGCCACTGAACTT-TAAGTTGCTCAAACACACTAACTGTGGAAG----AGTAGTACAA  
Orangutan GCTGCCACTGAACTT-GAAGTTGCTCAAACACACTAACTGTGGAAG----AGTAGTACAA  
Gibbon GATGCCACTGAACTT-TAAGTTGCTCAAACACACTAACTGTGGAAG----AGTAGTACAA  
Baboon GTTGCCACTGAACTT-TAAGTTGCTCGAACACACTAACTGTGGAAG----AGTAGTACAA  
Macaque GTTGCCACTGAACTT-TAAGTTGCTCGAACACACTAACTGTGGAAG----AGTAGTACAA  
Rhesus GTTGCCACTGAACTTTAAGTTGCTCGAACACACTAACTGTGGAAG----AGTAGTACAA  
Marmoset GCTGCTACTGAACTT-TAAGTTGCTCAAACATACTAACTGTGGAAG----AGCAGTACAA  
Squirrel\_monkey GCTGCTACTGAACTT-TAAGTTGCTCAAACATACTAACTGTGGAAG----AGCAGTACAA  
Tarsier ATTGCCACTGAGCCTCAGCTCCTCACACATTG--ACACCAACCGTGAAGGAGCCGTGCTA  
Bushbaby GCTGGCACTGAACTCCCTAGTTTCTCATACGCTCCGCTAACGATGGAAGGACTGTACAA  
Lemur -----

Human ATGAC---AAGTAGGCTTCCACCAAGCAAACTAGAAAATCAAAATTTGT-----TTCC  
Chimpanzee ATGAC---AAGTAGGCTTCCACCAAGCAAACTAGAAAATCAAAATTTGT-----TTCC  
Gorilla ATGAC---AAGTAGGCTTCCACCAAGCAAACTAGAAAATCAAAATTTGT-----TTCC



Orangutan ATAAAC---AAGTAGGCTTCCCACCAAGCAAACTAGAAAATCAAAATTTGT-----TCCC  
Gibbon ATGAC---AGGTAGGCTTCCCACCAAGCAAACTAGAAAATCAAAATTTGT-----TTCC  
Baboon ATGAC---AAGTAGGCTTCCCACCAAGCAAACTAGAAAATAAAAATTTGA-----TTCC  
Macaque ATGAC---AAGTAGGCTTCCCCT-----AGAAAATAAAAATTTGA-----TTCC  
Rhesus ATGAC---AAGTAGGCTTCCCCT-----AGAAAATAAAAATTTGA-----TTCC  
Marmoset ATGAC---AAGTAGGCTTCCCACCAAGCAAACTAGAAAATCAAAATTTGT-----TTCC  
Squirrel\_monkey ATGAC---AAGTAGGCTTCCCACCAAGCAAACTAGAAAATCAAAATTTGT-----TTCC  
Tarsier AT---GGCACCAGGATTCCCACCAGGCAGAGCTAGAAAATCTGTGCAGCA-----TGCT  
Bushbaby ATGACTGTTTCGACGGCTTCCCACCAGGCAAACTCAAAAATCAATGCATTTTTTTCCAGA  
Lemur -----

Human AGCAGTAGCACATCTTCAAGTCCCTCCTCCTCACTTCTCCTTTCTT---TTTTCTTTGC  
Chimpanzee AGCAGTAGTACATCTTCAAGTCCCTCCTCCTCACTTCTCCTTTCTT---TTTTCTTTGC  
Gorilla AGCAGTAGCACATCTTCAAGTCCCTCCTCCTCACTTCTCCTTTCTT---TTTTCTTTGC  
Orangutan AGCAGTAGCACATCTTCAAGTCCCTCCTCCTCACTTCTCCTTTCTT---TTTTCTTTGC  
Gibbon AGCAGTAGCACATCTTCAAGTCCCTCCTCCTCACTTCTCCTTTCTT---TTTTCTTTGC  
Baboon AGCAGTAGCACATCTTCAAGTCCCTCCTCCTCACTTCTCCTTTCTTAGACATTTCTTGT  
Macaque AGCAGTAGCACATCTTCAAGTCCCTCCTCCTCACTTCTCCTTTCTTAGACATTTCTTGT  
Rhesus AGCAGTAGCACATCTTCAAGTCCCTCCTCCTCACTTCTCCTTTCTTAGACATTTCTTGT  
Marmoset AGCAGTAGTACATCTTCAAGTCCCTTTTCACTTCTCCTTTTGAC---A-TTCTTTGT  
Squirrel\_monkey AGCAGTAGCACATCTTCAAGTCCCTTTTCACTTCTCCTTTTGAC---A-GTCTTTGT  
Tarsier TTCAGCAACCCATCTTCAAGTC-CTTTGCCCTACTTCTCCTTTGTTGATATTTCTTCT  
Bushbaby AGCAGCAGCCTGTCTTCAAAATCCCTGTGCTTTACTTCTTCTTTCTGTGACATTTCTTCT  
Lemur -----

Human CAAAACAAAACAGATCTACTTAAAAGGCCAAAGGCCACTGGAGAAA--GAGTTTATGATC  
Chimpanzee CAAAACAAAACAGATCTACTTAAAAGGCCAAAGGCCACTGGAGAAA--GAGTTTATGATC  
Gorilla CAAAACAAAACAGATCTACTTAAAAGGCCAAAGGCCACTGGAGAAA--GAGTTTATGATC  
Orangutan CAAAACAAAACAGATCTACTTAAAAGGCCAAAGGCCACTGGAGAAA--GAGTTTATGATC  
Gibbon CAAAACAAAACAGATCTACTTAAAAGGCCAAAGGCCACTGGAGAAA--GAGTTTATGATC  
Baboon CAAAACAAAACAGATCTACTTAAAAGGCCAAAGGCCACTGGAGAAA--GAGTTTATGATC  
Macaque CAAAACAAAACAGATCTACTTAAAAGGCCAAAGGCCACTGGAGAAA--GAGTTTATGATC  
Rhesus CAAAACAAAACAGATCTACTTAAAAGGCCAAAGGCCACTGGAGAAA--GAGTTTATGATC  
Marmoset CAAAACAAAACATATACTACTTAAAAGGTTAACGGCCACTGGAGAAA--CAGTTTATGATC  
Squirrel\_monkey CAAAACAAAACAGATCTACTTAAAAGTTCAAAGGCCACTGGAGAAA--TAGTTCATGATC  
Tarsier CAAAACAAAACAGATCAACAAGAAATCA--AAGACCCTCAAGAAAGGGGCATGATTATA  
Bushbaby CAAGTCAATAA-----TAAAAGGTCAAAGTTCACTCAAAAAGTAAATTCATGCTA  
Lemur -----

Human -----AGACAACCCAGGTGTCTATGTCTAAAAGGGAATACAGGTCTTGAAATGAGAT  
Chimpanzee -----AGACAACCCAGGTGTCTATGTCTAAAAGGGAATACAGGTCTTGAAATGAGAT  
Gorilla -----AGACAACCCAGGTGTCTATGTCTAAAAGGGAATACAGGTCTTGAAATGAGAT  
Orangutan -----AGACAACCCAGGTGTCTATGTCTAAAAGGGAATACAGGTCTTGAAATGAGAT  
Gibbon -----AGACAACCCAGGTGTCTATGTCTAAAAGGGAATACAGGTCTTGAAATGAGAT  
Baboon -----AGACAACCCAGGTGTCTGTCTATAAGGGAATACAGGTCTTGAAATGAGAT  
Macaque -----AGACAACCCAGGTGTCTGTCTATAAGGGAATACAGGTCTTGAAATGAGAT  
Rhesus -----AGACAACCCAGGTGTCTGTCTATAAGGGAATACAGGTCTTGAAATGAGAT  
Marmoset -----AGAAAATACAGGTGTCTGTCTTAAAGAGAAATACAGGTCTTGAAATGAGAT  
Squirrel\_monkey -----AGAAAACACAGGTATCCTGTGTCTTAAAGAGAAATACAGATCTTGAAATGAGAT  
Tarsier CAACATAGGTG-TTTTGTGTCTAAAGGAGAAAAGGGAATTCAGGTCTCTAGATGAGAT  
Bushbaby AGACAACCCAGGTGTTGGGTGTCTAACGGAGAAAAGGGAACAGTGGTCTTAAATGAGAT  
Lemur -----

Human AGACTGTGAAAATAATGAATTAGTTAGAATTCATAGGGAAAGAACTTCATTCTTAAACAC  
Chimpanzee AGACTGTGAAAATAATGAATTAGTTAGAATTCACAGGGAAAGAACTTCATTCTTAAACAC  
Gorilla AGACTGTGAAAATAATGAATTAGTTAGAATTCATAGGGAAAGAACTTCATTCTTAAACAC  
Orangutan AGACTGTGAAAATAATGAATTAGTTAGAATTCATAGGGAAAGAACTTCATTCTTAAACAC  
Gibbon AGACTGTGAAAATAATGAATTAGTTAGAATTCATAGGGAAAGAACTTCATTCTTAAACAC  
Baboon AGACTG--GAAATAATGAATTAATTAGAATTCACAGGGAAAGAACTTCATTCTTAGCAT  
Macaque GGACTG--GAAATAATGAATTAGTTAGAATTCACAGGGAAAGAACTTCATTCTTAGCAT  
Rhesus AGACTG--GAAATAATGAATTAGTTAGAATTCACATGGAAAGAACTTCATTCTTAGCAT  
Marmoset AGACT--GAAATAATGAATTAGTTAGAATTCATAGGGAAGGAACTTCATTCTTAAACAC  
Squirrel\_monkey AGACTGTGAAAATAATGAATTCGTTAGAATTCATAGGGAAGGAACTTCATTCTTAAACAC  
Tarsier AGACTGTGAAAGTAATAAATTAGTTAGAATGGGTAGAAAAGAAGTTCCTTCTTAAATAC  
Bushbaby AGACTGTGAAGATAATAAATTAGCTAGAACTGACAGGAAAGAAC--CGATGCCTTAAACAC  
Lemur -----

Human TTATCATCATGGTATTGTTTCTGCGGTGTGTTATTACTTCAGTAACCTTCTCTGTAATG  
Chimpanzee TTATCATCATGGTATTGTTTCTGTGGGTGTTATTACTTCAGTAGCTTCTTCTGTAATG  
Gorilla TTATCATCATGGTATTGTTTCTGTGGGTGTTATTACTTCAGTAACCTTCTCTGTAATG  
Orangutan TTATCATCATGGTATTGTTTCTGTGGGTGTTATTACTTCAGTAACCTTCTCTGTAATG  
Gibbon TTATCATCATGGTATTGTTTCTGTGGGTGTTATTACTTCAGTAACCTTCTCTGTAATG  
Baboon TTATCTTCATGGTATTGTTTCTGTGGGTGTTATTAGTACTTCAGTAACCTTCTCTGTAATG

Macaque TTATCTTCATGGTATTGTTTCTGTGGTGTATTAGTACTTCAGTAACTTATTCTGTAAATG  
Rhesus TTATCTTCATGGTATTGTTTCTGTGGTGTATTAGTACTTCAGTAACTTATTCTGTAAATG  
Marmoset TTGTCATCATGGTATTGTTTCTGTGGTATATATTACTTCAGTAACTTCTTCTGTAAATG  
Squirrel\_monkey TTGTCATCATGGTATTGTTTCTGTGGTATATATTACTTCAGTAACTTCTTCTGTAAACG  
Tarsier TTCCACCATGGTATTGTTTGTGGTATATATTACTTCAGGATCCTCTTCTTATAATG  
Bushbaby TCTCCACCATGGTGC-----GTCTCTTCAGTATCATCTTCCATAAAC  
Lemur -----

Human ATCTAGGTTACATGTAGGTATGTATTTATCACAATAATCTGATGGCTGTCTAATAACTAG  
Chimpanzee ATCTAGGTTACATGTAGGTATGTATTTATCACAATAATCTGATGGCTGTCTAATAACTAG  
Gorilla ATCTAGGTTACATGTAGGTATGTATTTATCACAATAATCTGATGGCTGTCTAATAACTAG  
Orangutan ATCTAGGTTATACGTAGGTATGTATTTATCACAATAATCTGATGGCTGTCTAATAACTAG  
Gibbon ATCTAGGTTACATGTAGGTATGTATTTATCACAATAATCTGATGGCTGTCTAATAACTAG  
Baboon GTCTAGGTTACATGTAGGCATGTATTTATCACAATAATCTGATGGCTGTCTAATAACTAG  
Macaque ATCTAGGTTACATGTAGGCATGTATTTATCACAATAATCTGATGGCTGTCTAATAACTAG  
Rhesus ATCTAGGTTACATGTAGGCATGTATTTATCACAATAATCTGATGGCTGTCTAATAACTAG  
Marmoset ATCTAGGTTACATGTAGGTATATATTTATCACAATAATCTGATGGCTGTCTAATAACTAG  
Squirrel\_monkey AACTAGGTTACATGTAGGTATATATTTATCACAATAATCTGATGGCTGCCTAATAACTAG  
Tarsier ATCTAGGTTAGACGTGGGTATAAATGATTTTTCAGAAATGTGTTCTTAGTAGATTGTTATA  
Bushbaby ATCTAAGTTTCGATGTGGGTATAAATCATTCTTCTGGATTA-----  
Lemur -----GTAGATATTCTAT

Human TCACATACATGACATCTCTACTTCATAATAGTAGGAGCAACTT-ACCTAATCTGACTAA  
Chimpanzee TCACATACATGACATCTCTACTTCATAATAGTAGGAGAAACTT-ACCTAATCTGACTAA  
Gorilla TCACCTACATGACATCTCTACTTCATAATAGTAGGAGAAACTT-ACCTAATCTGACTAA  
Orangutan TCACATACATGACATCTCTACTTCATAATAGTAGGAGAAACTT-ACCTAATCTGACTAA  
Gibbon TCACATACATGACATCTCTACTTCATAATAGTAGGAGAAACTT-ACCTAATCTGACTAA  
Baboon TCACATACATGACTAGTAACATACATCTCTACTTCATATAGTAGGAGAAACTTACTCTAA  
Macaque TCACATACATGA-----CATCTCTACTTCATATAGTAGGAGAAACTTACTCTAA  
Rhesus TCACATACATGA-----CATCTCTACTTCATATAGTAGGAGAAACTTACTCTAA  
Marmoset TCACATGATGGCATCTCTACTTCATAATAGTAGGAGAAACTT-ACCTAATCTGACTAA  
Squirrel\_monkey TCACGTGCATGACATCTCTACTTCATAATAGTAGGAGAAACTT-ACCTAATCTGACTAA  
Tarsier TCACAAATAAATGATGG-----  
Bushbaby -----  
Lemur CACAATAAACCAATAAA-----

Human AGTAAATATGATACATAAGCCTTTTTAATTCTGCAATAACCCATTTCATCTTTATTATTA  
Chimpanzee AGTAAATATGATACATAAGCCTTTTTAATTCTGCAATAACCCATTTCATCT----TATTA  
Gorilla AGTAAATATGTTACATAAGCCTTTTTAATTCTGCAATAACCCATTTCATCTTTATTATTA  
Orangutan ATTAAATATGATACATAAGCCTTTTTAATTCTGCAATAACCCATTTCATCTTTATTATTA  
Gibbon AGTAAATATGATACATAAGCCTTTTTAATTCTGCAATAACCCATTTCATCTTTACTATTA  
Baboon AGTAAATATGATACATATGCCTTTTTAATTCTGCAATAACCCATTTCATCTTTATTAAATA  
Macaque AGTAAATATGATACATATGCCTTTTTAATTCTGCAATAACCCATTTCATCTTTATTAAATA  
Rhesus AGTAAATATGATACATATGCCTTTTTAATTCTGCAATAACCCATTTCATCTTTATTAAATA  
Marmoset AGTAAATATGATAATA-TGCCTTTTTAATTCTGCAATAACCCATTTCATCTTTATTATTA  
Squirrel\_monkey AGTGAATATGATACATATGCCTTTTTAATTCTGCAATAACCCATTTCATCTTTATTATTA  
Tarsier -----  
Bushbaby -----  
Lemur -----

Human ATAGATTTTTTAAA-----TTACCAGTACGTATTTTTCTGAAATGTGTGCAATCAATCCTT  
Chimpanzee ATAGATTTTTTAAA-----TTACCAGTACGTATTTTTCTGAAACGTGTGCAATCAATCCTT  
Gorilla ATAGATTTTTTAAA-----TTACCAGTACGTATTTTTCTGAAACGTGTGCAATCAATCCTT  
Orangutan ATAGATTTTTTAAA-----TTACCAGTACATATTTTTCTGAAACGTATGCAATCAATCCTT  
Gibbon AAATAGATTTTTTAAA-ATTACCAGTACGTATTTTTCTGAAACGTATGCAATCAATCCTT  
Baboon GATTTTTTAA-----ATTACCAATATGTATTTTTCTGAAATGTATGCAATCAATCCTT  
Macaque GATTTTTTAA-----ATTACCAATATGTATTTTTCTGAAATGTATGCAATCAATCCTT  
Rhesus GATTTTTTAA-AAAAAATTACCAATATGTATTTTTCTGAAATGTATGCAATCAATCCTT  
Marmoset ATAGTTAGATTTTTTAAAGTTACCAACACATATTTTTCTGAAATATATGCAATCAGTACTT  
Squirrel\_monkey ATAGTTAGATTTTTTTTTTT-----  
Tarsier -----CTCT-----  
Bushbaby -----CGTTC TAGTAGATATATATCACAA-----TAAACCAATAGCT  
Lemur -----CTCT-----

Human TGTCAATCTTTACTACTACGATCTGAAGAAAGTTGCAATCCAAGAGAATAAGGGTTAC  
Chimpanzee TGTCAATCTTTACTACTATGATCTGAAGAAAGTTGCAATCCAAGAGAATAAGGGTTAC  
Gorilla TGTCAATCTTTACTACTATGATCTGAAGAAAGTTGCAATCCAAGAGAATAAGGGTTAC  
Orangutan TGTCAATCTTTACTACTACGATCTGAAGAAAGTTGCAATCCAAGAGAATAAGGGTTAC  
Gibbon TGTCAATCTTTACTATG-ATC--TGAAGAAAGTTGCAATCCAAGAGAGTAAGGGTTAC  
Baboon TGTCAATCTTTACTACTATGATCTGAAGAAAGTTGCAATCCAAGAGAGTAAGGGTTAC  
Macaque TGTCAATCTTTACTACTATGATCTGAAGAAAGTTGCAATCCAAGAGAGTAAGGGTTAC  
Rhesus TGTCAATCTTTACTACTATGATCTGAAGAAAGTTGCAATCCAAGAGAGTAAGGGTTAC  
Marmoset TGTCAATCTTTACTACT-ATGATCTAAAAAGTTGCAATCAAGAGAATAAGGGTTAC

Squirrel\_monkey -----  
Tarsier -----CTAATAACTAGTCACATACATGAC-----  
Bushbaby TT----CTAATTACCAGTCACATGTAGCAGCTCTATTTCTAAATAGAGAAATGTGTTGT  
Lemur -----CTAATAACTAGTCACATATGTGGC-----

Human AATTATACTTGAAGATGAGAGTGCTAAAAATCTGTGATATGTTTGAAAACCTA-----  
Chimpanzee AATTATACTTGAAGATGAGAGTACTAAAAATCTGTGATATGTTTGAAAACCTA-----  
Gorilla AATTATGCTTGAAGATGAGAGTACTAAAAATCTGTGATATGTTTGAAAACCTA-----  
Orangutan AATTATACTTGAAGATGAGAGTACTAAAAATCTGTGATATGTTTGAAAACCTA-----  
Gibbon AATTATACTTGAAGATGAGAGTACTAAAAATCTG--TGATGTTTGAAAACCTA-----  
Baboon AATTATACTTGAAGATGAGAGTACTAAACATCTGTGATATATCTGAAAACCTAGCCAATG  
Macaque AATTATACTTGAAGATGAGAGTACTAAACATCTGTGATATATCTGAAAACCTAGCCAATG  
Rhesus AATTTTACTTGAAGATGAGAGTACTAAACATCTGGGATATATCTGAAAACCTAGCCAATG  
Marmoset AATTATACTTGAAGATGAGCATACTAAAAATCTATGATATGTTTGAAAACCTA-----  
Squirrel\_monkey -----  
Tarsier -----ATCTCTACTT-----  
Bushbaby AATTTGACTTAACTCTGACTCA-----TATGCCTTTTTATTATATAATAATAACAT  
Lemur -----ATCTCTACTT-----

Human -----  
Chimpanzee -----  
Gorilla -----  
Orangutan -----  
Gibbon -----  
Baboon GGTGACTACTGCTTTCAGTACCTGACTTGCTGCCTAGTAACTAACTGGGTGCCTAAAA  
Macaque GGTGACTACTGCTTTCAGTACCTGACTTGCTGCCTAGTAACTAACTGGGTGCCTAAAA  
Rhesus GGTGACTACTGCTTTCAGTACCTGACTTGCTGCCTAGTAACTAACTGGGTGCCTAAAA  
Marmoset -----  
Squirrel\_monkey -----  
Tarsier -----CATATTAGTAAGAGAACTTGCTCTAAT  
Bushbaby AT-----  
Lemur -----CATAATAGAAGGAGGAGCTTGTCCCTAAT

Human -----  
Chimpanzee -----  
Gorilla -----  
Orangutan -----  
Gibbon -----  
Baboon TTCCCTTTGTTTATTTTCAACTTCAATTATATATAAAATGAAAGATATTGTTTAAATATC  
Macaque TTCCCTTTGTTTATTTTCAACTTCAATTATATATAAAATGAAAGATATTGTTTAAATATC  
Rhesus TTCCCTTTGTTTATTTTCAACTTCAATTATATATAAAATGAAAGATATTGTTTAAATATC  
Marmoset -----  
Squirrel\_monkey -----  
Tarsier TTG-----ACTAAA-----GTAAAATATGACACATATGCCTTTTTTAT-  
Bushbaby -----TCG--T-C-T-T--T-AC--T-T-G-T-T-  
Lemur TTG-----ACTA-----AATTATGACTCATATGCCTTTTTTAA-

Human -----  
Chimpanzee -----  
Gorilla -----  
Orangutan -----  
Gibbon -----  
Baboon CTTTCAGTACTCTAAGAATACATAACTGAATATAGAACAAGCTATATAAAGTACAAGGC  
Macaque CTTTCAGTACTCTAAGATTACATAACTGAATATAGAACAAGCTATATAAAGTACAAGGC  
Rhesus CTTTCAGTACTCTAAGATTACATAACTGAATATAGAACAAGCTATATAAAGTACAAGGC  
Marmoset -----  
Squirrel\_monkey -----  
Tarsier -----TCTAC--AATAACTCATT-----C-----A-TCTTTACTAGTTAGA  
Bushbaby A-G-A-T-T-T-C-C-T-T-A-A--T-G-G-C-T-A-A-C-A-C-T-T-T-T-T-A  
Lemur -----TGTAT--AATAACATATT-----C-----A-TCTTTACTAGTTAGA

Human -----  
Chimpanzee -----  
Gorilla -----  
Orangutan -----  
Gibbon -----  
Baboon TTAGTAAAAGAAACATCAGGCTAATACCTGAGTTTTTCATCTTAGTACAAAAGTCTAAAA  
Macaque TTAGTAAAAGAAACATCAGGCTAATACCTGCGTTTTTCATCTTAGTATAAAAAGTCTAAAA  
Rhesus TTAGTAAAAGAAACATCAGGCTAATACCTGAGTTTTTCATCTTAGTGTAAACTTCTCA  
Marmoset -----  
Squirrel\_monkey -----  
Tarsier TTTTTAAGAA--T-T-----A-CCAA--CAACAA  
Bushbaby -A-A-C-C-T--A-T-G-C-A-A-T-C-A-A-T-C-C-T-T-T-G-T-C-A-G-T--T-C

```

Lemur          TTTTTTAAAC----T-A-----C-CAACACTTTTGT

Human          -----
Chimpanzee    -----
Gorilla       -----
Orangutan     -----
Gibbon        -----
Baboon        TATTTTTTACCCCGACCTGAATATGGCTTAAACTTCTCATACAATGTACTACTAGCTTA
Macaque       TATTTTTTACCCCGACCTGAATATAGCTTAAACTTCTCATACAATGTACTACTAGCTTA
Rhesus        TA-----CAATGTACTANNNNNNNN
Marmoset      -----
Squirrel_monkey -----
Tarsier       TTTTTCTAAAACTGGGC-AATCAACCTTTTGTCTCTTT-----ACTAC-----
Bushbaby      -T-T-T-A-G-T-A-G-T-A-T-T-A-T-T-T-G-A-A-T-T--T-A-A-G-A-A-G-C-
Lemur         TTTTTTCCAAATCTATGC-AATCAATCCTTTTCTGCTCTTT-----GCTAG-----

Human          -----
Chimpanzee    -----
Gorilla       -----
Orangutan     -----
Gibbon        -----
Baboon        ATAGTCATTTTAGAATTAATTATTGCAAGTAGTTCATGGAGATAAATGCATTTTATTCA
Macaque       ATAGTCATTTTAGAATTAATTATTGCAAGTAGTTCATGGAGATAAATGCATTTTATTCA
Rhesus        NNNNNNNNNNNNNNNNNNNNNNNNNNNNNNN-----
Marmoset      -----
Squirrel_monkey -----
Tarsier       ---TATTATTTGATTTTAAGAAAGT-TGCAATGCAAAGAGA-----ATATAGGT---
Bushbaby      T-G-C-A-A-T-T-C-A-A-A--G-A-G-A-A-T-A-T-A-G-G-T-C-A-C-A-A-T-T
Lemur         ---TATTATTTGAATTTAAGAAAGT-TGCAATGCAAAGAGA-----ATATAGGT---

Human          -----
Chimpanzee    -----
Gorilla       -----
Orangutan     -----
Gibbon        -----
Baboon        ACTTTAAGTAGTTTGTTCATTGTTTTGACTATAAATAAGCAATCTCATCAATGATCACT
Macaque       ACTTTAAGTAGTTTGATTCATTGTTTTGATTATAAATAAGCAATCTCATCAATGATCACT
Rhesus        -----NNNNNN-----NNN
Marmoset      -----
Squirrel_monkey -----
Tarsier       ---TAC-AATTATATTTG-----AAGATGAGAGTACTAAAA-A--T---
Bushbaby      -A--T-A-A-T-T-G-A-A-G-G-G-A-G-A-G-T-A-G-T-G-A-A--A-A-T-A-T
Lemur         ---AAC-AAAAATAATTG-----AAGATGAGAATACTAACA-T--T---

Human          -----
Chimpanzee    -----
Gorilla       -----
Orangutan     -----
Gibbon        -----
Baboon        TCCAAGTTACAGTTTAATATCTTAATCATTACTCACAAAGCATTATAGGATTATTAATAA
Macaque       TCCAAGTTACAGTTTAATATCTTAATCATTACTCACAAAGCATTATAGGATTATTAATAA
Rhesus        NNNNN-----
Marmoset      -----
Squirrel_monkey -----
Tarsier       -----
Bushbaby      -----
Lemur         -----

Human          -----
Chimpanzee    -----
Gorilla       -----
Orangutan     -----
Gibbon        -----
Baboon        AGCTCCCTAAT---AGTATTATTATTTTCACTCTTTCCAAGGAGTCAGTTGTCAATATA
Macaque       AGCTCCCTAATAGATAATATTATTTTCACTCTTTCCAAGGAGTCAGTTGTCAATATA
Rhesus        -----NNNNNNNNNNNNNNNNNNNNNNNNNNNNNN
Marmoset      -----
Squirrel_monkey -----
Tarsier       -----
Bushbaby      -----
Lemur         -----

Human          -----GCAAATGGGTGACTCATAC

```

Chimpanzee -----GCAAATGGGTGACTCATA  
Gorilla -----GCAAATGGGTGACTCATA  
Orangutan -----GAAAATGGGTGACTCATA  
Gibbon -----GCAAATGGGTGACTCATA  
Baboon AAAAAATATGTTAATATAAGAATAGTAAGGAGCATTTTATAAATAAACTGTTAAAAGCAAA  
Macaque AAAAAATATGTTAATATAAGAATAGTAAGGAGCATTTTATAAATAAACTGTTAAAAGCAAA  
Rhesus NNNNNNNNNNNNNNTAAGAATAGTAAGGAGCATTTTATAAATAAACTGTTAAAAGCAAA  
Marmoset -----GCAAATGGGTGACTCATA  
Squirrel\_monkey -----  
Tarsier -----GTAT-----TGATACATTAGCAAATCA-----TTGACTCTTAC  
Bushbaby -----ATTGAGCCATTGGAAGACCTAGTGAATGGTTGACTCTTA  
Lemur -----CTAT-----TGATACACTGAAAACCTAGCAAATGGTTGACTCATTAG

Human TTTTCATTACCTTACTTGCTGCCTAGTAAACTAAACTGGGTGCCTAAAAATCCCTTTGTTT  
Chimpanzee TTTTCATTACCTTACTTGCTGCCTAGTAAACTAAACTGGGTGCCTAAAAATCCCTTTGTTT  
Gorilla TTTTCATTACCTTACTTGCTGCCTAGTAAACTAAACTGGGTGCCTAAAAATCCCTTCTGTTT  
Orangutan TTTTCATTACCTTACTTGCTGCCTAGTAAACTAAACTGAGTGCCTAAAAATCCCTTTGTTT  
Gibbon TTTTCATTACCTTACTTGCTGCCTAGTAAACTAAACTGGGTGCCTAAAAATCCCTTT----  
Baboon TTTTCATTACCTTACTTGCTGCCTAGTAAACTAAACTGGGTGCCTAAAAATCCCTTTGTT-  
Macaque TTTTCATTACCTTACTTGCTGCCTAGTAAACTAAACTGGGTGCCTAAAAATCCCTTT----  
Rhesus TTTTCATTACCTTACTTGCTGCCTAGTAAACTAAACTGGGTGCCTAAAAATCCCTTT----  
Marmoset TTTTCATTACCTTACTTGCTGCCTAGTAAACTAAACTGAGTGCCTAAAAATCCCTTTCTGT  
Squirrel\_monkey -----  
Tarsier TTTTCATTACCTTACTTGCTGCCTAGTAAACTAAACTGGGTGCCTAAAAATCCCTTTCTAT  
Bushbaby TTTTCATTATCTCACTGGATGCCTAGTGAACCTAATCTGGGAATCTAAAAATCCCTTTGTAT  
Lemur TTTTCATTATTTTACTTGGTGCCTAATAAACTAAACTGGGTGCCTAAAAATCCCTTTGTAT

Human --ATTTTCAACTTCAATTATATATGCACAGTATTTTAATTACTTAGCATCTATTGTTCCA  
Chimpanzee --ATTTTCAACTTCAATTATATATGCACAGTATTTTAATTACTTAGCATCTATTGTTCCA  
Gorilla --ATTTTCAACTTCAATTATATATGCACAGTATTTTAATTACTTAGCATCTATTGTTCCA  
Orangutan --GTTTTCAACTTCAATTATATATGCACAGTATTTTAATTACTTAGCCTCTATTGTTCTA  
Gibbon --ATTTTCAACTTCAATTATATATGCACAGTATTTTAATTACTTAGCCTCTATTGTTCTA  
Baboon TATTTTTCAACTTTAATTATATATGCACAGTATTTTAATTACTTAGCCTCTATTGTTCCA  
Macaque -ATTTTTCAACTTTAATTATATATGCACAGTATTTTAATTACTTAGCCTCTATTGTTCCA  
Rhesus -ATTTTTCAACTTTAATTATATATGCACAGTATTTTAATTACTTAGCCTCTATTGTTCCA  
Marmoset TTATTTTCAACTTCTATTATATATAGGCACAGTATTTTAATTATTTAGCCTCTATTGTTCTA  
Squirrel\_monkey -----  
Tarsier TTATTTTCAACTTCAATT----ATACATACTATTTTAATTATCTAGCCTCTATTGTTCTA  
Bushbaby TTATTTTCAAGTTCAAAAT----ACATACACTATGTTAATCTGCAGCCTCTATTGTTGTA  
Lemur TTATTTTCAACTTCAATT----ATATGTACTATTTTAATTATCCAGCCTCTATTATACTA

Human GGTGCTTAGATTTTTCCACATCAAAAATCTCCAGTTTCCATTGTTGTTATTTCTGTTATA  
Chimpanzee GGTGCTTAGATTTTCCACATCAAAAATCTCCAGTTTCCATTGTTGTTATTTCTGTTATA  
Gorilla GGTGCTTAGATTTTTCCACATCAAAAATCTCCAGTTTCCATTGTTGTTATTTCTGTTATA  
Orangutan GGTGCTTAGATTTTTCCACATCAAAAATCTCCAGTTTCCATTGTTGTTATTTCTGTTATA  
Gibbon GGTGCTTAGATTTTTCCACATCAAAAATCTCCAGTTTCCATTGTTGTTATTTCTGTTATA  
Baboon GATGCTTAGATTTTTCCACATCAAAAATCTCCAGTTTCCATTGTTGTTATTTCTGTTATA  
Macaque GATGCTTAGATTTTTCCATATCAAAAATCTCCAGTTTCCATTGTTGTTATTTCTGTTATA  
Rhesus GATGCTTAGATTTTTCCATATCAAAAATCTCCAGTTTCCATTGTTGTTATTTCTGTTATA  
Marmoset GGTGCTTATATTTTTCTGCATCAAAATCTCCAGTTTCCATTGTTGTTATTTCTGTTTTA  
Squirrel\_monkey -----  
Tarsier AGTTCTTAAATTTTTCCATATCAAAATCTCCAAATTTCCATTATGTTATTTCTGTTGATA  
Bushbaby GTTT-CTCAAATTTTTCTATCAAAATCTCCAGTTTCCATTCTGTTATGTTCTGTTGTA  
Lemur AGTTCTTAGATTTTTCCACATCAAAATCTCCAGTTTCCATTGTTGTTATTTCTGTTGTTG

Human AGATTATTTCAAAGTAGTTTTTTCTTTATTGTTG---T-TTTTTCAAAGGGAGGCAGACTG  
Chimpanzee AGATTATTTCAAAGTAATTTTTTTCTTTATTGTTG---T-TTTTTCAAAGGGAGGCAGACTG  
Gorilla AGATTATTTCAAAGTAGTTTTTTCTTTATTGTTG---T-TTTTTCAAAGGGAGGCAGACTG  
Orangutan AGATTATTTCAAAGTAGTTTTTTCTTTATTGTTG---T-TTTTTCAAAGGGAGGCAGACTG  
Gibbon AGATTATTTCAAAGTAGTTTTTTCTTTATTGTTG---T-TTTTTCAAAGGGAGGCAGACTG  
Baboon AGATTATTTCAAAGTAGTTTTTTCTTTATTGTTG---C-TTTTTCAAAGGGAGGCAGACTG  
Macaque AGATTATTTCAAAGTAGTTTTTTCTTTATTGTTG---T-TTTTTCAAAGGGAGGCAGACTG  
Rhesus AGATTATTTCAAAGTAGTTTTTTCTTTATTGTTG---T-TTTTTCAAAGGGAGGCAGACTG  
Marmoset AGATTATTTCAAAGTAGTTTTTTCTTTATTGTTG---G-TTTTTCAAAGGGAGGCAGACTG  
Squirrel\_monkey -----  
Tarsier AGATTATTTCAAAGTAGTTATTTATTTTACTGTTGTTGTTCAAA-----GGGA  
Bushbaby AGATTATTTCAAAGTAGGTTTTTTGTTGTTGTTGTTG---TTTTTCAAAGGAAGCAGGTTG  
Lemur AGATTATTTCAAAGTAGTTTTTTTCTTTTAAATTTGTTGTTTTTCAAAGGGAGGCAGACTG

Human ACCAGTCGTGTTGGGGTTATTTTCAAAATGCTAGTTCCCTTCTGTATACAAATTCACACA  
Chimpanzee ACCAGTCGTGTTGGGGTTATTTTCAAAATGCTAGTTCCCTTCTGTATACAAATTCACACA  
Gorilla ACCAGTCGTGTTGGGGTTATTTTCAAAATGCTAGTTCCCTTCTGTATACAAATTCACACA  
Orangutan ACCAGTCGTGTTGGGGTTATTTTCAAAATGCTAGTTCCCTTCTGTATACAAATTCACACA

Gibbon ACCAGTCGTGTTGGGGTCATTTACAAATGCTAGTTCCT-TCTGTATACAAATTCACACA  
Baboon ACCAGTTGTGTTGGGGTTATTTACAAATGCTAGTTCCTTCTGTATACAAATTCACACA  
Macaque ACCAGTTGTGTTGGGGTTATTTACAAATGCTAGTTCCTTCTGTATACAAATTCACACA  
Rhesus ACCAGTTGTGTTGGGGTTATTTACAAATGCTAGTTCCTTCTGTATACAAATTCACACA  
Marmoset ACTAGTCGTGCTGGGGTTATTTACAAAGCTAGTTCCTTCTGTATACAAATTCACACA  
Squirrel\_monkey -----  
Tarsier GATAGTGGTGTGGGGTTATTTACAAATGCCAGTTCCTTCTGTATACACATTCACACA  
Bushbaby ACCAGTGGTGTGGGGTTATTTACAAATGCTGGTTCCTTCTGCACACACATTCACACA  
Lemur ACCAGTTGTGTTGGAGTTATTTACAAATGCTAGTTCCTTCTGTATACACATTCACACA

Human CGCACCCATATTCATACAAAT----GCTGGCCTTGGGTAATAA-AAATAAGGTTGCCAAA  
Chimpanzee CGCACCCATATTCATACAAAT----GCTGGCCTTAGGTAATAA-AAATAAGGTTGCCAAA  
Gorilla CGCACCCATATTCATACAAAT----GCTGGCCTTGGGTAATAA-AAATAAGGTTGCCAAA  
Orangutan CGCACCCATATTCATACAAAT----GCTGGCCTTAGGTAATAA-AAATAAGGTTGCCAAG  
Gibbon TGCACCCATATTCATACAAAT----GCTGGCCTTAGGTAATAAATAAAGGTTGCCAAG  
Baboon GGCACCCGTATTCATACAAAT----GCTGGCCTTAGGTAATAA-AAATAAGGTTGCCAAG  
Macaque GGCACCCGTATTCATACAAAT----GCTGGCCTTAGGTAATAA-AAATAAGGTTGCCAAG  
Rhesus GGCACCCGTATTCATACAAAT----GCTGGCCTTAGGTAATAA-AAATAAGGTTGCCAAG  
Marmoset AGCACCCATATTCACACAAAA----GCTGGCCTTAGGTAAG--AAAATAAGGTTGCCAAG  
Squirrel\_monkey -----  
Tarsier CGCTTCTATGCACACACATACACACTGACCTTAGGTA--GAAGATAAAATGGCCAAG  
Bushbaby TGCACCTACATACTCAGCAC----ACTGGCCAGGGAAGCAGACA--AAGTACAAG  
Lemur TGCACCTACATA----TACTCACGCACTGGCCCTAGATA--GAAGACAAAGTTGTCAAG

Human CATTTGAAGTCTTCAGACCATTCTTTCTTTGTTCTCCTTTGGGGAGCACCACCTCCCT  
Chimpanzee CATTTGAAGTCTTCAGACCATTCTTTCTTTGTTCTCCTTTGGGGAGCACCACCTCCCT  
Gorilla CATTTGAAGTCTTCAGACCATTCTTTCTTTGTTCTCCTTTGGGGAGCACCACCTCCCT  
Orangutan CATTTGAAGTCTTCAGACCATTCTTTCTTTGTTCTCCTTTGGGGAGCACCACCTCCCT  
Gibbon CATTTGAAGTCTTCAGACCATTCTTTCTTTGTTCTCCTTTGGGGAGCACC-----  
Baboon CATTTGAAGTCTTCAGACCATTCTTTCTTTGTTCTCCTTTGGGGATCACCACCTCCCT  
Macaque CATTTGAAGTCTTCAGACCATTCTTTCTTTGTTCTCCTTTGGGGATCACCACCTCCCT  
Rhesus CATTTGAAGTCTTCAGACCATTCTTTCTTTGTTCTCCTTTGGGGATCACCACCTCCCT  
Marmoset CATTTGAAGTCTTCAGACCATTCTTTCTTTGTTCTCCTTTGGGGAGCACCACCTCCCT  
Squirrel\_monkey -----  
Tarsier AATTTGAAGCTTCAGACCATTCTTTCTTTCTCCTTTTGGGAACATTGCCTCCTT  
Bushbaby TATTTGAAATCTCAGACCATTCTTCC--TTTCTCTTCTCAGGAACAGGACTTCCCT  
Lemur TATTTGAAATCTCAGACCATTCT----TTTCTCCTGTTTTGGGGAGCATCGGCTCCCT

Human TCAATTATTCTGCATCCTGCATTTCTCCTTACAAAGAGCCTGGTATCAGTCAC  
Chimpanzee TCAATTATTCTGCATCCTGCATTTCTCCTTACAAAGAGCCTGGTATCAGTCAC  
Gorilla TCAATTATTCTGCATCCTGCATTTCTCCTTACAAAGAGCCTGGTATCAGTCAC  
Orangutan TCAATTATTCTGCATCCTGCATTTCTCCTTACAAAGAGCCTGGTATCAGTCAC  
Gibbon -----ACCTCTCCTTACAAAGAGCCTGGTATCAGTCAC  
Baboon TCAATTATTCTGCATCCTCCTTTCTCCTTACAAAGAGCCTGGAATCAGTCAC  
Macaque TCAATTATTCTGCATCCTCCTTTCTCCTTACAAAGAGCCTGGAATCAGTCAC  
Rhesus TCAATTATTCTGCATCCTCCTTTCTCCTTACAAAGAGCCTGGAATCAGTCAC  
Marmoset TCAATTATTCTGCATCCTGTATTTCTCCTTACAAAGAGCCTGGTATCAGTCAC  
Squirrel\_monkey -----  
Tarsier TCAATGATCCTGCATCCTGCCTTCTCCTCCTTACAAAGAGCCTGGTGTAGTCAC  
Bushbaby TCAATTATCTGCATCCTGCATTTCTCCTTACAAAGAGCCTGGTGTAGTCAC  
Lemur TCAATTATTCTGCATCCTGCATTTCTCCTTACAAAGAGCCTGGTATCAGTCAC

Human AGCTCCTGGCACTCCTGA-GTTACATGGCCTACTTCTGAGGCACGCAAGATTTGGTAGC  
Chimpanzee AGCTCCTGCACTCCTGA-GTTACATGGCCTACTTCTGAGGCACGCATAGATTTGGTAGC  
Gorilla AGCTCCTGGCACTCCTGA-GTTACATGGCCTACTTCTGAGGCACGCATAGATTTGGTAGC  
Orangutan AGCTCCTGCACTCCTGA-GTTACATGGCCTACTTCTGAGGCACGCATAGATTTGGTAGC  
Gibbon AGCTCCTGCACTCCTGA-GTTACATGGCCTACTTCTGAGGCACACATAGATTTGGTAGC  
Baboon AGCTCCTGCACTCCTGA-GTTACATGGCCTACTTCTGAGGCACGCATAGACTTGGTAGC  
Macaque AGCTCCTGCACTCCTGA-GTTACATGGCCTACTTCTGAGGCACGCATAGACTTGGTAGC  
Rhesus AGCTCCTGCACTCCTGA-GTTACATGGCCTACTTCTGAGGCACGCATAGACTTGGTAGC  
Marmoset AGCTCCTGCACTCCTGA-GTTACATGGCCTACTTCTGAGGCACACATAGACTTGGTAGC  
Squirrel\_monkey -----  
Tarsier AGTCCCCATGCTCCTGAGTTACAATGGCCTACTTC-----  
Bushbaby ACTGCCCTGCTTCTGAG-TTACAGTGGCCTAGTTCCGAGGCATGCACAGACT-----  
Lemur AGCTCCTCCTCTG--AGTTACAGTGGCCTGATTTGAGGCATGCATATACTTGGTAGC

Human AAAGCAAAGGGAAGGGAAGTGGCAGACCTGTCTCTCAGCTGCCAGCTGCAATCTTTCTCG  
Chimpanzee AAAGCAAAGGGAAGGGAAGTGGCAGACCTGTCTCTCAGCTGCCAGCTGCAATCTTTCTCA  
Gorilla AAAGCAAAGGGAAGGGAAGTGGCAGACCTGTCTCTCAGCTGCCAGCTGCAATCTTTCTCG  
Orangutan AAAGCAAAGGGAAGGGAAGTGGCAGACCTGTCTCTCAGCTGCAATCTTTCTCG  
Gibbon AAAGCAAAGGGAAGGGAAGTGGCAGACCTGTCTCTCAGCTGCCAGCTGCAATCTTTCTCG  
Baboon AAAGCAAAGGGAAGGGAAGCAGACCTGT--CTCAGCTGCCAGCTGCAATCTTTCTCG  
Macaque AAAGCAAAGGGAAGGGAAGCAGACCTGT--CTCAGCTGCCAGCTGCAATCTTTCTCA

|                 |                                                                |
|-----------------|----------------------------------------------------------------|
| Rhesus          | AAAGCAAAGGGAAGGAAAGCGACAGACCTGT--CTCAGCTGCCAGCTGCAATCTTTCTCA   |
| Marmoset        | AAAGCGAAGGGAAGAAAATCGGCAGACCTGTCTCTCAGCTGGTAGCTGCAATCTTTCTGG   |
| Squirrel_monkey | -----                                                          |
| Tarsier         | -----CTCAATGGGCGGTTGCAACCTTTCTGG                               |
| Bushbaby        | -----CGGTAGCAGACTGGCCACTCAGCTGGCAGCTGTAATCTTCCAG               |
| Lemur           | AAAGC--AAAAGGAAGCGGCAGACTTGCCCTCAGCTGGCAGCGGCCACAATCTTTCTGG    |
|                 |                                                                |
| Human           | CACACCAGTGCCTCTCCTTCTTACAAGTTACGTCTGTCCGGTAGACGGACTGGCCCAACA   |
| Chimpanzee      | CACACCAGTGCCTCTCCTTCTTACAAGTTACGTCTGTCCGGTAGACGGACTGGCCAGCA    |
| Gorilla         | CACACCAGTGCCTCTCCTTCTTACAAGTTACGTCTGTCCGGTAGACGGACTGGCCCAACA   |
| Orangutan       | CACACCAGTGCCTCTCCTTCTTACAAGTTACGTCTGTCCGGTAGACGGACTGGCCCAACA   |
| Gibbon          | CACACCAGTGCCTCTCCTTCTTACAAGTTACGTCTGTCCGGTAGACGGACTGGCCCAACA   |
| Baboon          | CACACCAGTGCCTCTCCTTCTTACAAGTTACATCCTGTCTCAGTAGACGGACTGGCCCAACA |
| Macaque         | CACACCAGTGCCTCTCCTTCTTACAAGTTACATCCTGTCTCAGTAGACGGACTGGCCCAACA |
| Rhesus          | CACACCAGTGCCTCTCCTTCTTACAAGTTACATCCTGTCTCAGTAGACGGACTGGCCCAACA |
| Marmoset        | CACACCAGTGCCTCTCCTTCTTACAAGTTACATCCTGTCTCTAGACAGACTGGCCCAACA   |
| Squirrel_monkey | -----                                                          |
| Tarsier         | CATGCCAGTGCCTCTCTTTCTTACAAGTTACATCCTGCCTGAGACAGACAGGTTTC--AAC  |
| Bushbaby        | CACAGCAGCGGTTCTCTCTTACAAGTTACATCCTGTCTGTAGACAGACGGCCCAACA      |
| Lemur           | CACACCAGTGCCTCTCCTTCTTACAAGTTACATCCTGTCTGTGAGATAGACTGGCCCAACA  |
|                 |                                                                |
| Human           | ACAAGGTTATATCTATTGAGGTTAAACTTGCCCAAACAGTGTGTTGTTGGAGCAGAGAGG   |
| Chimpanzee      | ACAAGGTTATATCTATTGAGGTTAAACTTGCCCAAACACTGTTGTTGTTGGAGCAGAGAGG  |
| Gorilla         | ACAAGGTTATATCTATTGAGGTTAAACTTGCCCAAACAGTGTGTTGTTGGAGCAGAGAGG   |
| Orangutan       | ACAAGGTTGTATCTATTGAGGTTAAACTTGCCCAAACAGTGTGTTGTTGGAGCAGAGAGG   |
| Gibbon          | ACAAGGTTGTATCTATTGAGGTTAAACTTGCCCAAACAGTGTGTTGTTGGAGCAGAGAGG   |
| Baboon          | ACAAAATTTGTATCTATTGAGGTTAAACTTGCCCAAACAGTGTGTTGTTGGAGCAGAGAGG  |
| Macaque         | ACAAAATTTGTATCTATTGAGGTTAAACTTGCCCAAACAGTGTGTTGTTGGAGCAGAGAGG  |
| Rhesus          | ACAAAATTTGTATCTATTGAGGTTAAACTTGCCCAAACAGTGTGTTGTTGGAGCAGAGAGG  |
| Marmoset        | ACAAGGTTGTATCTATTGAGGTTAAACTTGCCCAAACAGGTTGTTGTTGGAGCAGAGAGG   |
| Squirrel_monkey | -----                                                          |
| Tarsier         | AACAAGGTTTAGCTATTGAGGTTGAACCTCTCCCAAAGGCTGTTTATTGGGGCAGAGGGG   |
| Bushbaby        | ACAAGGTTGTATCTATTGAGGTTAAACTTCCCAAAGGGGTTGTTGTTGGAGCAGAGAGG    |
| Lemur           | ACAAGGTTGTATCTATTGAGGTTAAACTTCCCAAAGGGTGTGTTGTTGGAGCAGATGGG    |
|                 |                                                                |
| Human           | CAGAAAGCGTACA-----AAATAGGAAGGTGAGTCTCGAAAGAGTTAAAAATCCAGCC     |
| Chimpanzee      | CCGAAAGCGTACA-----AAATAGG-AGGTGAGTTGTCGAAAGAGTTAAAAATCCAGCC    |
| Gorilla         | CAGAAAGCGTACA-----AAATAGGAAGGTGAGTCTCGAAAGAGTTAAAAATCCAGCC     |
| Orangutan       | CAGAAAGGGTCCA-----AAATAGGAAGGTGAGTCTCAAATAGTTAAAAATCCAGCC      |
| Gibbon          | CAGAAAGCATA-----AAATAAGAAGGTGAGTCTCGAAAGAGTTAAAAATCCAGCC       |
| Baboon          | AAGAAAGGGTACA-----AAATAGGAAGGTGAGTCTCGAAAGAGTTAAAAATCCAGCC     |
| Macaque         | AAGAAAGGGTACA-----AAATAGGAAGGTGAGTCTCGAAAGAGTTAAAAATCCAGCC     |
| Rhesus          | AAGAAAGGGTACA-----AAATAGGAAGGTGAGTCTCGAAAGAGTTAAAAATCCAGCC     |
| Marmoset        | CAGAAAGAGTGAA-----AAACAGGAAGGTGAGTCTCAAAGAGTTAAAAATCCACCC      |
| Squirrel_monkey | -----                                                          |
| Tarsier         | CAGAATGGAGGCTATGTGTGAAACAGGAAAGTGGGTTCTCAAAGAGTTAAAAATACAGTC   |
| Bushbaby        | AGAAGTGTGTG-----AAATAGGAAGGTGGTGTCTCCGAGGAGCTGAAATCCAGCC       |
| Lemur           | CAGAAGGAAGGCTGCCTGTGAAATAGGAAGGTAGATCTCAAAGAGTTAAAAATCCAGTC    |
|                 |                                                                |
| Human           | TTAAAAATTC--ACATATGCTCAGTCAGGTAATCATCATGAATTTTT-----           |
| Chimpanzee      | TTAAAAATTC--ACATATGCTCAGTCAGGTAATCATCATGAATTTTT-----           |
| Gorilla         | TTAAAAATTC--ACATATGCTCAGTCAGGTAATCATCATGAATTTTT-----           |
| Orangutan       | TTAAAAATTC--ACATATGCTCAGTCAGGTAATCATCATGAATTTTT-----           |
| Gibbon          | TTAAAAATTC--ACATATGCTCAGTCAGGTAATCATCATGAATTTTT-----           |
| Baboon          | TTAAAAATTC--ACATATGCTCAGTCAGGTAATCATCATGAATTTTT-----           |
| Macaque         | TTAAAAATTC--ACATATGCTCAGTCAGGTAATCATCATGAATTTTT-----           |
| Rhesus          | TTAAAAATTC--ACATATGCTCAGTCAGGTAATCATCATGAATTTTT-----           |
| Marmoset        | TTAAAAATTC--ACATATGCTCAGTCAGGTAATCATCATGAATTTTT-----           |
| Squirrel_monkey | -----                                                          |
| Tarsier         | TGTCAAAATTCATATAATCTCAGTCAAGTAAATCCCGTGGTTTTTTAAGCTGATATTT     |
| Bushbaby        | TGTCAAAATTC--TACCATCAGTC--AGGA-AGACCTCGTGATATTT-----           |
| Lemur           | TGTCAGAATTCATATAATGCTCAGTCAAGTAAATCCCGTGGTTTTTTAAGCTGATATTT    |
|                 |                                                                |
| Human           | -TACTGATATTTTGTCTAGAAAGATAGTGATATTAACATATCTAGAAAAGAAAAACCTT    |
| Chimpanzee      | -TACTGATATTTTGTCTAGAAAGATAGTGATATTAACATATCTAGAAAAGAAAAACCTT    |
| Gorilla         | -TACTGATATTTTGTCTAGAAAGATAGTGATATTAACATATCTAGAAAAGAAAAACCTT    |
| Orangutan       | -TACTGATATTTTGTCTAGAAAGATAGTGATATTAACATATCTAGAAAAGAAAAACCTT    |
| Gibbon          | -TACTGATATTTTGTCTAGAAAGATAGTGATATTAACATATCTAGAAAAGAAAAACCTT    |
| Baboon          | TTACTGATATTTTGTCTAGAAAGATAGTGATATTAACATATCTACAAAAGAAAAACCTT    |
| Macaque         | TTACTGATATTTTGTCTAGAAAGATAGTGATATTAACATATCTAGAAAAGAAAAACCTT    |
| Rhesus          | TTACTGATATTTTGTCTAGAAAGATAGTGATATTAACATATCTAGAAAAGAAAAACCTT    |
| Marmoset        | TAAGTATATTTTGTCTAGAAAGATAATGATATTAACGTATTTCTAGAAAAGAAAAAGCTT   |
| Squirrel_monkey | -----                                                          |

Tarsier T TACTGATATGTTGTTCTAGAAAGATAGTAATCTTAGCATATTTGGAAAACTT-----  
Bushbaby T AATCGATATTTTGTCTGGGAGACAGTAATATTAGCGTATTCTAGAAAGGAAAAATGATT  
Lemur A TTTTG-----TTTTCAGATAGTAATGTTTGATATTTCTAGAAAGCAA-----  
  
Human G ATTCAGTAAAAACCTCCTTAAGTGAGAGATACATGATTAATGTTGATGACAAAAATATA  
Chimpanzee G ATTCAGTAAAAACCTCATTAAGTGAGAGATACATGATTAATGTTGATGACAAAAATATA  
Gorilla G ATTCAGTAAAAACCTCATTAAGTGAGAGATACATGATTAATGTTGATGACAAAAATATA  
Orangutan G ATTCAGTAAAAACCTCATTAAGTGAGAGATACATGATTAATGTTGATGACAAAAATATA  
Gibbon G ATTCAGTAAAAACCTCATTAAGTGAGAGATACATGATTAATGTTGATGACAAAAATATA  
Baboon G ATTCAGTAAACAACCTCACTAAGTGAGAGATACGTGATTAATGTTGATGACAAAAATATA  
Macaque G ATTCAGTAAACAACCTCACTAAGTGAGAGATACGTGATTAATGTTGATGACAAAAATATA  
Rhesus G ATTCAGTAAACAACCTCACT----GAGAGATACGTGATTAATGTTGATGACAAAAATATA  
Marmoset G ATTCAGCAA--AACCTCATTAAGTGGGAGATATATGACTAAATGTTGATAACAAAAACATT  
Squirrel\_monkey -----  
Tarsier T AATTCAGTAGAACATCACTAAGTAAGAGATATATGATTAAGATGTTGACAAAAATG  
Bushbaby A CTTCAGTAAAAACA--TTGTTGTTGAGAAATGCATGATTAATGTTGGTAGCAAAAAGTT  
Lemur A ACTTTTAGTAAAAACATTACTGAGTGAGAGATACATGACTAAATGTTTGT--CAAAAAATTA  
  
Human T TTT-TGAGGTTATC-----TCAAAGTTTAATGAAGTTCTAAATATATAGAATGATTGA  
Chimpanzee T TTT-TGAGGTTATC-----TCAAAGTTTAATGAAGTTCTAAATATATAGAATGATTGA  
Gorilla T TTT-TGAGGTTATC-----TCAAAGTTTAATGAAGTTCTACATATATAGAATGATTGA  
Orangutan T TTT-TGAGGTTATC-----TCAAAGTTTAATGAAGTTCTAAATATATAGAATGATTGA  
Gibbon T TTT-TGAGGTTATC-----TCAAAGTTTAATGAAGTTCTAAATATACAGAATGATTGA  
Baboon T TTT-TGAGGTTATCTCA-----AAGTTTAATGAAGTTCTAAATATATAGAATGATTGA  
Macaque T TTT-TGAGGTTATCTCA-----AAGTTTAATGAAGTTCTAAATATATAGAATGATTGA  
Rhesus T TTT-TGAGGTTATCTCA-----AAGTTTAATGAAGTTCTAAATATATAGAATGATTGA  
Marmoset T TTT-TGAGGTTATTTCA--TATACAAGTTTAATGAAGTTCTAAATATATAGAATGACTAA  
Squirrel\_monkey -----  
Tarsier - TTTTCGAGGTTATCTCATATACTTAAGTTTAATGAAGTCTAAATATCTAGAATTTATG  
Bushbaby A TTTTGTGTTGTTCTAATAGACTTAAATGAAATGAAGTGCTAAATATAGAAA--TGACCAC  
Lemur - TTTTGAGGTTATCTAATACACTTAAGTTTAATGAAGTTCTAAATATATAAAATGATTGC  
  
Human A TATACACT--TTAAGAAAACATGCAATAGGTGACTGGATAGAGCTGAAAAAGAGGCATCC  
Chimpanzee A TATACACT--TTAAGAAAACATGCAATAGGTGACTGGATAGAGCTGAAAAAGAGGCATCC  
Gorilla A TATACACT--TTAAGAAAACATGCAATAGGTGACTGGATAGAGCTGAAAAAGAGGCATCC  
Orangutan A TATACACT--TTAAGAAAACATGCAATAGGTGACTGGATAGAGCTGAAAAAGAGGCATCC  
Gibbon A TATACACT--TTAAGAAAACATGCAATAGGTGACTGGATAGTGTCTGAAAAAGAGGCATCC  
Baboon A TATACACTTTTAAAGAAAACATGCAATAGGAGACTAGATAGAGCTGAAAAAGAGGCATCC  
Macaque A TATACACTTTTAAAGAAAACATGCAATAGGAGACTAGATAGAGCTGAAAAAGAGGCATCC  
Rhesus A TATACACTTTTAAAGAAAACATGCAATAGGAGACTAGATAGAGCTGAAAAAGAGGCATCC  
Marmoset A TATACATT--TTAAGAAAACATGAAAATAGGTGACTGGGTAGAGCTGAAAAAGAGGCATCC  
Squirrel\_monkey A TATACATA--TTAAGAAAACATGAAAATAGGTGACTGGGTAGAGCTGAAAAAGAAGCATCC  
Tarsier A GACACACT--TTAATAAAACAT-----  
Bushbaby A TATACACT--TTGAGTAAACATGAAACAGA--TCATGAGTG--GAGTTGAAGAGGCAGCC  
Lemur C TAAGCACT--TTAAGTAAACATGAAAATAGGTGACTGGGTGGAGCTGAAAAAGAGCCAC  
  
Human A TATATTTTAGATT-----GTTC---ATTTCTTGATATTTGATTTTATGTATGAGAGTG  
Chimpanzee A TATATTTTAGATT-----GTTC---ATTTCTTATATATTTGATTTTATGTATGAGAGTG  
Gorilla A TATATTTTAGATT-----GTTC---ATTTCTTATATATTTGATTTTATGTATGAGAGTG  
Orangutan A TATATTTTAGATT-----GCTC---ATTTCTTTTATATTTGATTTTATGTATGAGAGTG  
Gibbon A TATATTTTAGATT-----GTTC---ATTTCTTATATATTTGATTTTATGTATGAGAGTG  
Baboon A TAGATTTTAGATT-----GTTC---ATTTCTTATATATTTGATTTTATGTATGAGAGTG  
Macaque A TAGATTTTAGATT-----GTTC---ATTTCTTATATATTTGATTTTATGTATGAGAGTG  
Rhesus A TAGATTTTAGATT-----GTTC---ATTTCTTATATATTTGATTTTATGTATGAGAGTG  
Marmoset A AATATTTTAGATT-----GTTC---ATTTCTTATATACTTGATTTTATGCATGAGAGTT  
Squirrel\_monkey A AATATTTTAGATT-----GTTC---ATTTCTTATACTTCAATTTTATGTATGAAAGTG  
Tarsier A GAT-----ATTTTGAACATTTTCTTT--ACATGTTTGTCTTTACATATGAGACTG  
Bushbaby A AGTGTTTTAGATT-----GTTCATTTTCTATATATACATTTGATTTTATGTGTAACGTG  
Lemur A AATATTAATATTTTAGATTGTTTCTTTTATATATATTTGATTTTATGTGTGAGAGTG  
  
Human T TTTGTTATCCTGATTTAGAATGAAATGACTTTGAGTGGTATTTGTGGATTCAATT--TTTT  
Chimpanzee T TTTGTTATCCTGATTCAGAATGAAATGACTTTGAGTGGTATTTGTGGAATCAATTGTTTT  
Gorilla T TTTGTTATCCTGATTTAGAATGAAATGGCTTTGAGTGGTATTTGTGGAATCAATT--TTTT  
Orangutan T TTTGTTATCCTGATTCAGAATGAAATGACTTTGAGTGGTATTTGTGGAATCAATT--TTTT  
Gibbon T TTTGTTATCCTGATTCAGAATGAAATGACTTTGAGTGGTATTTGTGGAATCAATT--TTTT  
Baboon T TTTGTTATCCTGATTCAGACTGAAATGACTTTGGATGGTATTTGTGGAATCACTTTTTTTT  
Macaque T TTTGTTATCCTGATTCAGACTGAAACGACTTTGAATGGTATTTGTGGAATCACTTTTTTTT  
Rhesus T TTTGTTATCCTGATTCAGACTGAAACGACTTTGAATGGTATTTGTGGAATCACTTTTTTTT  
Marmoset T TTTGTCATCCTGATTCAGAATGAAATGACTTTGAATGGTATTTGTGGAATCACT--TGTT  
Squirrel\_monkey T TTTGTCATCCTGATTCAGAATGAAATGACTTTGATGGTATTTGTGGAATCACT--TGTT  
Tarsier T TTTGTCACCTGA---TTCAGAAAATGACTTTAATGGTACTTGTAGCATCGTT--TTTT  
Bushbaby T TTTGTCATGCTTATTTCTGAATAAAATGACTTTAATGGTCTTGTAGAAATTTACT--TTCT  
Lemur T TTTGTCATGCTGATTCGAATGAAATGACTTTAATGGTACTTGTAGAAATTTACT--TTTT



Human TCTAGCCTGAGGAATAATCTATTGTAGAAAAGTTGAAAAGTTGCTCTAATTCGCTAATAT  
Chimpanzee TCTAGCCTGAGGAATAATCTATTGTGAAAAGTTGAAAAGTTGCTCTAATTCGCTAATAT  
Gorilla TCTAGCCTGAGGAATAATCTATTGTAGAAAAGTTGAAAAGTTGCTCTAATTCGCTAATAT  
Orangutan TCTAGCCTGAGGAATAATCTATTGTGAAAAGTTGAAAAGTTGCTCTAATTCGCTAATAT  
Gibbon TCTAGCCTGAGGAATAATCTATTGTGAAAAGTTGAAAAGTTGCTCTAATTCGCTAATAT  
Baboon TCTAGCCTGAGGAATAATTTATTGTGAAAAGTTGAAAAGTTGCTCTAATTCGCTAATAT  
Macaque TCTAGCCTGAGGAATAATTTATTGTGAAAAGTTGAAAAGTTGCTCTAATTCGCTAATAT  
Rhesus CCTAGCCTGAGGAATAATTTATTGTGAAAAGTTGAAAAGTTGCTCTCATTACATATAT  
Marmoset TCTAGCCTGAGGAATAAGTTTATTGTGAAAAGTTGAAAAGTTGCTCTTATTGCTAATAT  
Squirrel\_monkey TCTAGCCTGAGAAAATAATTTATTGTGAAAAGTTGAAAAGTTGCTCTGATTTGCTAATAT  
Tarsier TCTCGCCCGAGAAAATAATTTACTGTAGAAGAGTTGAAAAGTTGCTATAATTCGCTAATAT  
Bushbaby TTTAGCCTGAGGAATAATTTATTGTGAAAAGTTGAAAAGTTGCTCCAATTTGCTAACAT  
Lemur TCTAGCCCAAGGATTAATTTATTGTGAAAAGTTAAAAGTTACTTTACTTTGCTAATAT

Human TTCAAAGCATCATTTATTTTCTCAGGAAAGGA-----CCGAAAACTCGGATCC  
Chimpanzee TTCAAAGCATCATTTATTTTCTCAGGAAAGGA-----CCGAAAAATCGGATCC  
Gorilla TTCAAAGCATCATTTATTTTCTCAGGAAAGGA-----CCGAAAAATCGGATCC  
Orangutan TTCAAAGCATCATTTATTTTCTCAGGAAAGGA-----CCGAAAAATCAGATCC  
Gibbon TTCAAAGCATCATTTATTTTCTCAGGAAAGGA-----CCGAAAAATCAGATCC  
Baboon TTCAAAGCATCATTTATTTTCTCAGGAAAGGA-----CCGAAAAATGGATCC  
Macaque TTCAAAGCATCATTTATTTTCTCAGGAAAGGA-----CCGAAAAATCGGATCC  
Rhesus TTNNNNNNNNNNNNNNNNNNNNNNNNNNNNN-----NNNNNNNN  
Marmoset TTCAAAGCATCATTTATTTTCTCAGGAAAGGA-----CTGAAAAATCAATTC  
Squirrel\_monkey TTCAAAGCATCATTAATTTTTCAGGAAAGGA-----CCGAAAAATCAGTTCC  
Tarsier TTCAAAGCATCATTTATTTTGTACGAAATAAACAGAGAGAAGCAGAGAGATTAGTTCC  
Bushbaby TTTAAAGCATCATTTATTTTACAGAAAAGGA-----CCGAAAGAATCAAATG  
Lemur TGTGAAGCATCATTTATTTTCTCAGAGA-----AAGAACCAGAAAGATTAGTTCC

Human AAACCTAAAATGTCAATACTCATAGTTTAGCATTTTC-AAAAAGAATAACTACATGGAGTT  
Chimpanzee AAACCTAAAATGTCAATACTCATAGTTTAGCACTTA-AAAAAGAATAACTACATGGAGAT  
Gorilla AAACCTAAAATGTCAATACTCATAGTTTAGCATTTTC-AAAAAGAATAACTACATGGAGTT  
Orangutan AAACCTAAAATAACAATACTCATAGTTTAGCATTTTA-AAAAAGAATAACTACATGGAGTT  
Gibbon AAACCTAAAATATCAATACTCATAGTTTAGCATTTTA-AAAAAGAATAACTACATGGAGTT  
Baboon AAACCTAAAATATCAATACTCATAGTTTAGCATTTTA-AAAAAGAATAACTATGTGGAGTT  
Macaque AAACCTAAAATATCAATACTCATAGTTTAGCATTTTA-AAAAAGAATAACTATGTGGAGTT  
Rhesus NNNNNNNNNNNNNNNNNNNNNNNNNNNNTAGTTTAGCATTTTA-AAAAAGAATAACTATGTGGAGTT  
Marmoset AAAATTTAAAATATCAATACTCATAGTTTAGCATTTTA-AAAAAGAATAACTACATGGAGTT  
Squirrel\_monkey AAACCTAAAATATCAATACTCATAGTTTAGCATTTTA-AAAAAGAATAACTACATGGAGTT  
Tarsier AAATTTAAAATGTCAACACTGGTGGTTTGGCATTCA-AAAAAGAGTAACTACATGGAGTT  
Bushbaby TA-----AAACATCAACACAGGTACTTTAGTGATCAAAAATGAGTAAGTTACGTGCAGTT  
Lemur AAATTTAAAATGTCAACACTAGTACTTTAGCATTTCA-AAAAAGAGTAACTACATGGAGTT

Human ACCAGTGATACTTTTAAAATTTATATTTTGTCTATGTGTAC---TGTTTCAACAAAGTC  
Chimpanzee ACCAGTGATACTTTTAAAATTTATATT-TTTCTATGTGTAC---TGTTTCAACAAAGCC  
Gorilla ACCAGTGATACTTTTAAAATTTATATTTTGTCTATGTGTAC---TGTTTCAACAAAGTC  
Orangutan ACCAGTGATACTTTTAAAATTTATATTTTGTCTATGTGTAC---TGTTTCAACAAAGTC  
Gibbon ACCAGTGATACTTTTAAAATTTATATTTTGTCTATGTGTAC---TGTTTCAACAAAGTC  
Baboon ACCAGTGATACTTTTAAAATTTATATTTTGTCTATGTGTAC---TGTTTCAACAAAGTC  
Macaque ACCAGTGATACTTTTAAAATTTATATTTTGTCTATGTGTAC---TGTTTCAACAAAGTC  
Rhesus ACCAGTGATACTTTTAAAATTTATATTTTGTCTATGTGTAC---TGTTTCAACAAAGTC  
Marmoset ACCAGTGATATTTTTAAAATTTATATTTTGTCTATGTGTAC---TGTTTAAACAAAGTC  
Squirrel\_monkey ACCAGTGATATTTTTAAAATTTACATTTTGTCTATATGCAC---TGTTTAAACAAAGTC  
Tarsier ACCAGTGATATTTTTAAAATTTATATCTTGTATGTGTACTGTTTGT-TTGCAAAATC  
Bushbaby ACCAGTGATACTTAAGAATTTATCTTCTTGCATGTGTACAGTTTGT-TTGGCAAAGTC  
Lemur ACCAGTTATACTTTTAAAATTTATATCTTGTCTATATGTATAGTTTTTT-TGGCCAAATC

Human ATGAGTATACCAAAGCGAGCTAACAGTCTTCATTCCAAAATGTTGCCCCAAAATAATTTTC  
Chimpanzee ATGAGTATACCAAAGCGAGCTAACAGTCTTCATTCCAAAATGTTGCCCCAAAATAATTTTC  
Gorilla ATGAGTATACCAAAGCGAGCTAACAGTCTTTATTCCAAAATGTTGCCCCAAAATAATTTTC  
Orangutan ATGAGTATACCAAAGCGAGCTAACAGTCTTCATTCCAAAATGTTGCCCCAAAATAATTTTC  
Gibbon ATGAGTATACCAAAGCGAGCTAAGTCT--TCATTCCAAAATGTTGCCCCAAAATAATTTTC  
Baboon ATGAGTATACCAAAGTGAGCTAACAGTCTTCATTCCAAAATGTTGCCCCAAAATAATTTTC  
Macaque ATGAGTATACCAAAGTGGGCTAACAGTCTTCATTCCAAAATGTTGCCCCAAAATAATTTTC  
Rhesus ATGAGTATACCAAAGTGGGCTAACAGTCTTCATTCCAAAATGTTGCCCCAAAATAATTTTC  
Marmoset GTAAGTATACCAAAGTGGGCTAACAGT--CTTC-ATTCAAAATGTTGCCCCAAAATAATTTTC  
Squirrel\_monkey ATAAGTATACCAAAGTGGGCTAACAGC--CTTC-ATTCAAAATGTTGCCCCAAAATAATTTTC  
Tarsier ATAAGTATACCAAAGTGAACGAACAGTGTTCATTCCAAAATGTTGCCCCAAAATAATTTTC  
Bushbaby ATAAGTATACCAAAGGTAAAGCTAACAGCTTCATTCCAAAATGTTCCCTCAAATAATTTTC  
Lemur TTAAGTATACCAAAGGTGAGCTAACAGTCTTCATTCCAAAATGTTCCCTCAAATAATTTTC

Human TGAACCACATGACAGATGTTTGATACAGATGACTAAATTTCTGTCTATGTTTGTATTG  
Chimpanzee TGAACCACATGACAGATGTTTGATACAGATGACTAAATTTCTGTCTATGTTTGTATTG

Gorilla TGAACCACATGACAGATGTTTGATACAGATGACTAAATTTCTGTCATGTTTGTGTTTATTG  
Orangutan TGAACCACATGACAGATGTTTGATACAGATGACTAAATTTCTGTCATGTTTGTGTTTATTG  
Gibbon TGAACCACATGACAGATGTTTGATACAGATGACTAAATTTCTGTCATGTTTGTGTTTATTG  
Baboon TGAACCACATGACAGATGTTTGATACAGATGACTAAATTTCTGTCATGTTTATTGATAC  
Macaque TGAACCACATGACAGATGTTTGATACAGATGACTAAATTT-----  
Rhesus TGAACCACATGACAGATGTTTGATACAGATGACTAAATTT-----  
Marmoset TGAACCACATGACAGATGTTTGATACAGATAACTAAATTTTCTGTTATGTTTGTGTTTATAG  
Squirrel\_monkey TGAACCACATGACAGATGTTTGATACAGATAACTAAATTTT--GTTATGTTTGTGTTTATAG  
Tarsier TGAACCACATGGCAGAAATTCGATACAGGTGACTAAATTTTATTATTATTATTGTTA  
Bushbaby TGAACCACATGGCAGAAATTTGATACAGATGACTAAATTTGCTGTCAGATTTGGTTATGA  
Lemur TGAACATAATGGCAGAAATCTGATACAGATGACTAAATTTGCTGTCATATTCCGGTATTA

Human TTAAT-----AGTAAAACCAACAGAGAGTGCTAGACT  
Chimpanzee TTAAT-----AGTAAAACCAACAGAGAGTGCTAGACT  
Gorilla TTAAT-----AGTAAAACCAACAGAGAGTGCTAGACT  
Orangutan TTAAT-----AGTAAAACCAACAGAGAGTGCTAGACT  
Gibbon TTAAT-----AGTAAAACCAAC-----AGTGCTAGACT  
Baboon AGATGACTAAATTTCTGTCATGTTTATTGTTAATAGTAAAACCAACAGAGTGCTAGACT  
Macaque -----CTTGTGTCATGTTTATTGTTAATAGTAAAGCCAACAGAGTGCTAGACT  
Rhesus -----CTTGTGTCATGTTTATTGTTAATAGTAAAGCCAACAGAGTGCTAGACT  
Marmoset TTAAT-----AGTAAAACCAACAGAGAGTGCTAGGCT  
Squirrel\_monkey TTAAT-----AGTAAAACCAACAGAGAGTGCTAGACG  
Tarsier ATTGTAA-----AACCA--ACAAAGTGCTAGAC-  
Bushbaby TTAATAGC-----AAAACCAACAGGGAATGCTAGACT  
Lemur TTAATAGT-----AAAACCAACAGAGAAATGCTAGAC-

Human TTAGACACTAATATCTTCAAAATATGGACTTACATGAAACTAGACAGCAATATCATCTTA  
Chimpanzee TTAGACACTAATATCTTCAAAATATGGACTTACATGAAACTAGACAGTGATATCATCTTA  
Gorilla TTAGACACTAATATCTTCAAAATATGGACTTACATGAAACTAGACAGCGATATCATCTTA  
Orangutan TTAGACACTAATGTCCTTCAAAATATGGACTTACATGAAACTAGACAGCAATATCATCTTA  
Gibbon TTAGACACTAATATCTTCAAAATATGGACTTACATGAAACTAGACAGCAATATCATCTTA  
Baboon TCAGACACTAATATCTTCAAAATATGGACTTACATGAAACTAGACAGCGACATCATCTTA  
Macaque TCAGACACTAATATCTTCAAAATATGGACTTACATGAAACTAGACAGCGACATCATCTTA  
Rhesus TCAGACACTAATATCTTCAAAATATGGACTTACATGAAACTAGACAGCAACATCATCTTA  
Marmoset CTAGACAAGCATATCTTAGAAATATAAACTTACGTGAAACTAGACAGAAATATCATCTCA  
Squirrel\_monkey TTAGACAACATATCTTAGAAATATAAACTTACATGAAACTAGACAGAAATATCATCTCA  
Tarsier TTAGGAACTAATACATGAAATATGAGTTTACATGAAACCAGACAGAGATATCAATTTA  
Bushbaby TTAGATGCTAA-----TACTATTATGAACTTGCACGAAACCATACAGATGTATCTTCTTA  
Lemur TTTAGAACTAATACCT-TAAAATATGAACTTATGTGAAACCATAAGGAGATATCATCTTA

Human AAGTACTTTTTCTCTTAAACAAACAAATCGAAAAAAGCAAAGATCAGAGATGAAAGGAA  
Chimpanzee AAGTACTTTTTCTCTTAAACAAACAAATCGAAAAAAGCAAAGATCAGAGATGAAAGGAA  
Gorilla AAGTACTTTTTCTCTTAAACAAACAAATCGAAAAAAGCAAAGATCAGAGATGAAAGGAA  
Orangutan AAGTACTTTTTCTCTTAAACAAACAAATCGAAAAAAGCAAAGATCAGAGATGAAAGGAA  
Gibbon AAGTACTTTTTCTCTTAAACAAACAAATCGAAAAAAGCAAAGATCAGAGATGAAAGGAA  
Baboon AAGTACTTTTTCTCTTAAACAAACAAATCGAAAAAAGCAAAGATCAGAGTTGAAAGGAA  
Macaque AAGTACTTTTTCTCTTAAACAAACAAATCGAAAAAAGCAAAGATCAGAGTTGAAAGGAA  
Rhesus AAGTACTTTTTCTCTTAAACAAACAAATCGAAAAAAGCAAAGATCAGAGTTGAAAGGAA  
Marmoset AAGTACTTTTTCTCTTAAACGAA-----CGAAAAAAGCAAAGATCAGAGATGAAAGGAA  
Squirrel\_monkey AAGTACTTTTTCTCTTAAACAAACAAACCGAAAAAAGCAAAGATCAGAGATGAAAGGAA  
Tarsier AAGTACTTTTATCGTTT-AAACAAACAAATCAAAAACAAAGTCCAGAAAGGAAGGGGA  
Bushbaby AAGAACTTTTTCTCTTGAACAAACAAACAGGGAAGCAAAGATCAGTTAAAGGGAA  
Lemur AAGTACTTTTTCACTT-GAACAAACAAACAAAAAATCAAAGATCAGAGATGGTGGGAA

Human GAAAAGTATATCGAGTGACACCATGTGTGTCAGCCAGACACTGGGATAGATGCTTCATATAC  
Chimpanzee GAAAAGTATATCGAGTGACACCATGTGTGTCAGCCAGACACTGGGATAGATGCTTCATATAC  
Gorilla GAAAAGTATATCGAGTAAACCATGTGTGTCAGCCAGACACTGGGTTAGATGCTTCATATAC  
Orangutan GAAAAGTATATCGAGTGACACCATGTGTGTCAGCCAGACACTGGGATAGATGCTTCATATAC  
Gibbon GAAAAGTATATCGAGTGACACCATGTGTGTCAGCCAGACACTGGGATAGATGCTTCATATAC  
Baboon GAAAAATACATTGAGTGACACCATATGGCAGCCAGACACTGGGATAGATGCTTCATATAC  
Macaque GAAAAATACATTGAGTGACACCATATGGCAGCCAGACACTGAGGTAGATGCTTCATATAC  
Rhesus GAAAAATACATTGAGTGACACCATATGGCAGCCAGACACTGAGGTAGATGCTTCATATAC  
Marmoset GAAAAATATATTGAGCGACACTACATGTGCTAGCTAGACCTGGGATAGATGCTTTATATAC  
Squirrel\_monkey GAAAAATACATTGAGCGACACTACATGTGCTAGCCAGACACTGGGATAGATGCTTTATATAC  
Tarsier GAAAACATATGCTGAGT--GCACTATAGCCAGCCAGACACTGGGATAGACGCTTCATATAA  
Bushbaby TTCACATACGGTTAGTGACGCTCTATGCCAGCCAGGTAAGTGGGATAGACGCTTTACATAC  
Lemur GAAACATACATTTAGTGATCTTATATGCTATCCAGACACTGGGATAGATACTTTACATAC

Human CTTAGGTCATTTAACGTTATAGTTAAGTAGAAAATG-----TTTTAAAATTGT  
Chimpanzee CTTAGGTCATTTAACGTTATAGTTAAGTAGAAAATG-----TTTTAAAATTGT  
Gorilla CTTAGGTCATTTAACGTTATAGTTAAGTAGAAAATG-----TTTTAAAATTGT  
Orangutan CTTAGGTCATTTAACATTTATAGTTAAGTAGAAAATG-----TTTTAAAATTGT  
Gibbon CTTAGGTCATTTAACGTTATAGTTAAGTAGAAAATG-----TTTTTAAAGTTGT

Baboon CTTAGGTCATTTAACGTTATAGTTAAGTAGAAAATG-----TTTTAAAGTTGT  
Macaque CTTAGGTCATTTAACGTTATAGTTAAGTAGAAAATG-----TTTTAAAGTTGT  
Rhesus CTTAGGTCATTTAACGTTATAGTTAAGTAGAAAATG-----TTTTAAAGTTGT  
Marmoset CTTAGGTCATTTAATGTTTTAGTTAAGTAGAAGATG-----TTTTAAAGTTGT  
Squirrel\_monkey CTTAGGTCATTTAATGTTTTAGTTAAGTAGAAGATG-----TTTTAAAGTTGT  
Tarsier CTGAGGTCACCTAACATTA-----AGTGAAA----CAGGAAATGTTTCAAAGTTGT  
Bushbaby CTTACATCATTGAGAAGCTGTGGTTAAATAAAGAGCTAAACAGAAAATGTGTCAAGGTTGT  
Lemur CTTAGGTCATTTAACATTTATGGTTAAATAGCTAAA----CAGAAAATGTTTCAACTTGT

Human GGAGGTGTT-TAACTAGTTTTTCATTTTCTAAGCCAGCACAGCTGTTGACTCACCTGTTC  
Chimpanzee GGAGGTGTT-TAACTAGTTTTTCATTTTCTAAGCCAGCACAGCTTTTGACTCACCTGTTC  
Gorilla GGAGGTGTT-TAACTAGTTTTTCATTTTCTAAGCCAGCACAGCTTTTGACTCACCTGTTC  
Orangutan GGAGGTGTTTTAACTAGTTTTTCATTTTCTAAGCCAGCACAGCTTTTGATTACCTGTTTT  
Gibbon GGAGGTGTT-TAACTAGTTTTTCATTTTCTAAGCCAGCACAGCTTTTGACTCACCTGTTC  
Baboon GGAGGTATT-TAACTAGTTTTTCATTTTCTAAGCCAGCACAGCTTTTGACTCACCTGTTC  
Macaque GGAGGTATT-TAACTAGTTTTTCATTTTCTAAGCCAGCACAGCTTTTGACTCACCTGTTC  
Rhesus GGAGGTATT-TAACTAGTTTTTCATTTTCTAAGCCAGCACAGCTTTTGACTCACCTGTTC  
Marmoset GAAGGTGTT-TAACTAATTTTTTCATTTTCTAAGTCAGTACAGCTTTTGACTCACCTGTTC  
Squirrel\_monkey GAAGGTGTT-TAACTAGTTTTTCATTTTCTAAGTCAGCACAGCTTTTGACTCACCTGTTC  
Tarsier GGAGATGTC-CCACTAGTTTTTCATTTTCTAAGCCAGCACACACCACCTGACTCACAGGTTTC  
Bushbaby GGAGG-----TGTTTAAATTTTTTCATCTTCTAAGTGAGCACAATCCTTGACTCACAGGTTTC  
Lemur GGAGGTGTT-TAACTAGTTTTTCATTTTCTAAGGAGCATAACCCTTGATTACATGTTTC

Human ATAATGCAGAGATTATTTGTTCTGCCCTACGTTTCTGTTGCACAACATTTTCCCTCCTTT  
Chimpanzee ATAATGCAGAGATTATTTGTTCTGCCCTACGTTTCTATTGTACAACATTTTCCCTCCTTT  
Gorilla ATAATGCAGAGATTATTTGTTCTGCCCTACGTTTCTGTTGCACAACATTTTCCCTCCTTT  
Orangutan ATAATGCAGAGATTATTTGTTCTGCCCTACGTTTCTGTTGCAC---ATTTTCTCCTTTT  
Gibbon ATAACGCAGAGATTACTTGTCTGCCCTACGTTTCTGTTGCAC---ATTTTCTCCTTTT  
Baboon ATAATGCAGAGATTATTTGTTCTGCCCTGCATTTCTGTTGCACAACATTTTCTCCTTTT  
Macaque ATAATGCAGAGATTATTTGTTCTGCCCTGCGTTTCTGTTGCACAACATTTTCTCCTTTT  
Rhesus ATAATGCAGAGATTATTTGTTCTGCCCTGCGTTTCTGTTGCACAACATTTTCTCCTTTT  
Marmoset C-AATGCAAAAGATTATTTGTTCTACCCTATGTTTCTGTTGCACAACATTTTCTCCTTTT  
Squirrel\_monkey ACAATGCAAAAGATTATTTGTTCTACCCTATGTTTCTGTTGCACAACATTTTCTCCTTTT  
Tarsier ATACTGCAGAGATCATTTGCACTACCCTTTGTTTCTGTTGCACAAGATCCTTCTCCTTTT  
Bushbaby ATAATGTGAAGATTATTTGCTCTGCTCTG-----TGCTTTTCTCTTTTAT  
Lemur ATCATGCAAAAGATTATTTGCTCTGCCCTATGTTTCTTGCACAAGATTTTCTGCTCTTTT

Human AAAAGTCATTTA-----TTGAATCATCATCTGTCTCAGGCTTGATACGGTATAGCCCTCG  
Chimpanzee AAAAGTCATTTA-----TTGAATCATCACCTGTCTCAGGCTTGATACGGTATAGCCCTCG  
Gorilla AAAAGTCATTTA-----TTGAATCATCATCTGTCTCAGGCTTGATACTGTATAGCCCTCG  
Orangutan AAAAGTCATTTA-----TTGAATCATCATCTGTCTCAGGCTTGATACGGTATAGCCCTCG  
Gibbon AAATGTCATTTA-----TTGAATCATCATCTGTCTCAGGCTTGATATGGTATAGCCCTCG  
Baboon AAAAGACATTTA-----TTGAATCATCATCTGCCCTCAGGCTTGATATGGCATAGCCCTCG  
Macaque AAAAGACATTTA-----TTGAATCATCATCTGCCCTCAGGCTTGATATGGCATAGCCCTCG  
Rhesus AAAAGACATTTA-----TTGAATCATCATCTGCCCTCAGGCTTGATATGGCATAGCCCTCG  
Marmoset AAAAGTCATCTA-----TTGAATCATCATCTGCCCTCAGGCTTGATATGGTATAGCCCTCA  
Squirrel\_monkey AAAAGTCATTTA-----TTGAATCATCATCTGCCCTCAGGCTTGATATGGTATAGCCCTCA  
Tarsier AATCAAGAAATCTTATTTTTGAATCATCATCTGTCTCAGGCTTGAGATGGTGTAGTCTCTG  
Bushbaby AAATCTTGTTC-----TTGAATCATCATCTGCCCTCAGGCTTGATATGGTGTACTCTCA  
Lemur ATAAGCCTTCCCTCTTGA---TTCATCATCTGCCCTCAGGCTGAATGTGGTGTAGTCTCTG

Human AAAGACTGGTTTAG-TACTTAAACCCACCTTTCAAATATTTCC-AGTGCAGGC---CAT  
Chimpanzee AAAGACTGGTTTAG-TACTTCAACCAGCCTTTCAAATATTTCC-AGGGCAGGC---CAT  
Gorilla AAAGACTGGTTTAG-TACTTCAACCCGCTTTCAAATATTTCC-AGTGCAGGC---CAT  
Orangutan AAAGACTGGTTTAGTACTTCAACTCGCCTTTCAAATATTTCCAGTGCAGGC---CAT  
Gibbon AAAGACTGGTT-TAGTACTTCAACTCGCCTTTCAAATATTTCCAG-TGCAGGC---CAT  
Baboon AAAGACTGGTT-TAGTACTTCAACTCACCTTTCAAATATTTCCAG-TGCAGGC---CAT  
Macaque AAAGACTGGTT-TAGTACTTCAACTCACCTTTCAAATATTTCCAG-TGCAGGC---CAT  
Rhesus AAAGACTGGTT-TAGTACTTCAACTCACCTTTCAAATATTTCCAG-TGCAGGC---CAT  
Marmoset AAAGACTGGTT-TCGTACTTCAAGTACGCTTTCAAATATTTCCAG-TGCAGGC---CT  
Squirrel\_monkey A-AGACTGGTT-TAGTACTTCAAGTACGCTTTCAAATATTTCCAG-TGCAGGC---CT  
Tarsier CCAGACTGGT-TTAGTGCATCAACTCACCTTTCAAATATTTCCAGTGCAGGCCACTCAT  
Bushbaby AGAGACTGCT-TTAGTACTTCAACTCACCTTTCAAATATTTCCAGTGCAGGCCACTCAT  
Lemur AAAGACTGGT-TTAGAAGTCAACTCACCTTTCAAATATTTCCAGTGCAGGCCACTCAC

Human TCAGTGTTCAGGTACCTAATGAGTCATTTTCTTCTCC-CAGTCTACCAAGCAGGATCT  
Chimpanzee TCAGTGTTCAGGTACCTAATGAGTCATTTTCTTCTCC-CAGTCTACCAAGCAGGATCT  
Gorilla TCAGTGTTCAGGTACCTAATGAGTCATTTTCTTCTCC-CAGTCTACCAAGCAGGATCT  
Orangutan TCAATGTTCAGGTACCTAATGAGTCATTTCTCTTCC-AGTCTANNNNNNNNNNNNN  
Gibbon TCAGTGTTCAGGTACCTAATGAGTCATTTTCTTCTCCAGTCTACCAAGCAGGATCTC  
Baboon TCAGTGTTCAGGTACCTAATGAGTCATTTTCTTCTCCAGTCTACCAAGCAGGATCTC  
Macaque TCAGTGTTCAGGTACCTAATGAGTCATTTTCTTCTCCAGTCTACCAAGCAGGATCTC  
Rhesus TCAGTGTTCAGGTACCTAATGAGTCATTTTCTTCTCCAGTCTACCAAGCAGGATCTC

Marmoset TCACTGTTCAGGTACCTAATGAGTCATTTTCTCTTCCCAGTCTACCAAGCAGGATCTC  
Squirrel\_monkey TCAGTGTTCAGGTACCTAATGAGTCATTTTCTCTTCCCAGTCTACCAAGCAGGATCTC  
Tarsier TCAGTGTCCCAGGTGCCACTGAGTCATTTTCTCTTCCCAGTAAACTGAGCAGGATATC  
Bushbaby TCAGTGTCCCAGGACCTAATGAGTCATTTTCTCTTCCAATTAATGAACAGGATATC  
Lemur TCAGTATCCCAGGTACCTAATGAGTCATTTTCTCTTCCAATCTAGTGAACAGGGTATC

Human CAAAGCCTCCTTTATCTTTCTGGGTGTATACAGAG-----  
Chimpanzee CAAAGCCTCCTTTATCTTTCTGGGTGTATACAGAG-----  
Gorilla CAAAGCCTCCTTTATCTTTCTGGGTGTATACAGAG-----  
Orangutan NNNNNNNNNNNNNNNNNNNNNNNNNNNNNNNNNNNNNNNNNNNNNNNNNNNNNNNNNNNNN  
Gibbon AAAGCCTCCTTTATCTTTCTGGGTGTATA--CAGTCATTAAGCTCAAATATGTCCCTTGC  
Baboon AAAGCCTCCTTTATCTTTCTGGGTGTACACAGAGTCATTAAGTCAAATATGTCCCTTGC  
Macaque AAAGCCTCCTTTATCTTTCTGGGTGTATACAGAGTCATTAAGTCAAATATGTCCCTTGC  
Rhesus AAAGCCTCCTTTATCTTTCTGGGTGTACACAGAGTCATTAAGTCAAATATGTCCCTTGC  
Marmoset AAAGCCTCCTTTATCTTTCTGGGTGGATACAGAGTCATTAAGTCAAATATGTCCCTTGC  
Squirrel\_monkey AAAGCCTCCTTTATCTTTCTGGGTGGATACAGAGTCATTAAGTCAAATATGTCCCTTGC  
Tarsier AAAGCCTCCTTTATCTTTCTGGGTGGATACAGAGTCATTAAGTCAAATATGCCCCTTGC  
Bushbaby AAAGCCTCCTTTATCTTTCTGGGTGGTACCGAGTCATTAAGCTTGGCCAATAGACTTGA  
Lemur AAACCCCTCCTTTATCTTTCTGGGTGGATACAGAGTCATTAAGTCAAATATGCCCCTTGC

Human -----  
Chimpanzee -----  
Gorilla -----  
Orangutan NNNNNNNNNNNNNNNNNNNNNNNNNNNNNNNNNNNNNNNNNNNNNNNNNNNNNNNNNNNNN  
Gibbon CAATAGACTT-GGGGGTTGGGT---TTAGT-TATTAAGTGGTGA-GTCTCCACCCAG-C  
Baboon CAACAGACTTGAGGGTTGGGTTAGTATTAACTT---GGTTGAGTCTCCACCCAGCT  
Macaque CAACAGACTTGAGGGTTGGGTTAGTATTAACTT---G-GTGAGTCTCCACCCAGCT  
Rhesus CAACAGACTTGAGGGTTGGGTTAGTATTAACTT---G-GTGAGTCTCCACCCAGCT  
Marmoset CAATAGACTT-GAGGATGGGC---TTAGT-TATTAAGTGGTGA-GTCTCCACCCAG-C  
Squirrel\_monkey CAATAGACTT-GAGGGTTGGGT---TTAGT-TATTAAGTGGTGA-GTCTCCACCCAG-C  
Tarsier CAATAGACTTGAGAGCTGGGTTAGTATTAACTTGTGAGCCT-----CCA-CCAGC  
Bushbaby GGGTTGGGTTACTTAT-----TAACTTGGTGAGCCTCC-G-CCAGC  
Lemur CAATAGACTTGAGGGTTGGGTTAGTATTAACTTGGTGAGCCT-----CCG-CCAGC

Human -----  
Chimpanzee -----  
Gorilla -----  
Orangutan NNNNNNNNNNNNNNNNNNNNNNNNNNNNNNNNNNNNNNNNNNNNNNNNNNNNNNNNNNNNN  
Gibbon TAACTATTCT-AGGAAATTAT-----TTGGTGAGTCAGGCATCTTTGTATT  
Baboon -AACTATTCTAGGAAA-----TCATTTGGTGAGTCAGGCATCTTTGTATT  
Macaque -AACTATTCTAGGAAA-----TCATTTGGTGAGTCAGGCATCTTTGTATT  
Rhesus -AACTATTCTAGGAAA-----TCATTTGGTGAGTCAGGCATCTTTGTATT  
Marmoset TAACTATTCT-AGGAAATCAT-----CTGGTGAGTCAGGCATTTTGTATT  
Squirrel\_monkey TAACTATTCT-AGGAAATCAT-----TTGGTGAGTCAGGCATTTTGTATT  
Tarsier TAACTATTCTAGGAAATA-----ATCTGGTGAGTCAGGTGTTTCATATT  
Bushbaby TAACTATTCTAGGAAATA-----ATTTGGTGAGTCAGGTGTTTTCATATT  
Lemur TAACTATTCTAGGAAATA-----ATTTGGTGAGTCAGGTGTTTTCATATT

Human -----  
Chimpanzee -----  
Gorilla -----  
Orangutan NNCCTTTCAAAAATATTGTCAGTGCAGGCCATCAATGTTCCAGGTAATAAGTGCATT  
Gibbon CACATCGCA-----  
Baboon CACATTGCA-----  
Macaque CACATTGCA-----  
Rhesus CACATTGCA-----  
Marmoset CACATTGCA-----  
Squirrel\_monkey CACATTGCA-----  
Tarsier CATATTTTCAT-----  
Bushbaby CATATTTTCAT-----  
Lemur CAAGTTTCAT-----

Human -----T  
Chimpanzee -----T  
Gorilla -----T  
Orangutan TCCTCTCCAGTCTACAAGCATCTCAAAGCCTCCTTTATCTTTCTGGGTGTATACAGAGT  
Gibbon -----  
Baboon -----  
Macaque -----  
Rhesus -----  
Marmoset -----  
Squirrel\_monkey -----  
Tarsier -----

Bushbaby -----  
Lemur -----

Human CATTAAGCTCAAATATGTCCTTTGCCAATGGACTTGAGGGTTGGGTTAGTTATTAACTT  
Chimpanzee AATTAAGCTCAAATATGA-----GACTTGAGGGTTGGGTTAGTTATTAACTT  
Gorilla CATTAAGCTCAAATATGTCCTTTGCCAATGGACTTGAGGGTTGGGTTAGTTATTAACTT  
Orangutan CATTAAGCTCAAATATGTCCTTTGCCAATAGACTTCAGGGTTGGGTTAGTTATTAACTT  
Gibbon -----  
Baboon -----  
Macaque -----  
Rhesus -----  
Marmoset -----  
Squirrel\_monkey -----  
Tarsier -----  
Bushbaby -----  
Lemur -----

Human GGTGAGTCTCCACCCAGCTAACTATTCTAGGAAATCATTGGTGAGTCAGGCATTCTTGT  
Chimpanzee GCTGAGTCTCCACCCAGCTAACTATTCTAGGAAATCATTGGTGAGTCAGGCATTCTTGT  
Gorilla GGTGAGTCTCCACCCAGCTAACTATTCTAGGAAATCATTGGTGAGTCAGGCATTCTTGT  
Orangutan GGTGAGTCTCCACCCAGCTAACTATTCTAGGAAATCATTGGTGAGTCAGGCATTCTTGT  
Gibbon -----  
Baboon -----  
Macaque -----  
Rhesus -----  
Marmoset -----  
Squirrel\_monkey -----  
Tarsier -----  
Bushbaby -----  
Lemur -----

Human ATTCACATTGCA  
Chimpanzee ATTCACATTGCA  
Gorilla ATTCACATTGCA  
Orangutan ATTCACATTGCA  
Gibbon -----  
Baboon -----  
Macaque -----  
Rhesus -----  
Marmoset -----  
Squirrel\_monkey -----  
Tarsier -----  
Bushbaby -----  
Lemur -----
